# Supplementary material for: Self-assembled porphyrin–peptide cages for photodynamic therapy
Source: Royal Society of Chemistry journal article supplement (doi:10.1039/d3ob01887c), 2024-01-01
Supplement: d3ob01887c1.pdf [file d3ob01887c1.pdf]

## **Supporting Information**

## Contents

|                                                      |    |
|------------------------------------------------------|----|
| 1. Preparation of Zn-TPP-Ald .....                   | 3  |
| 2. Peptide syntheses .....                           | 4  |
| 3. Characterization of TPP conjugates and cages..... | 29 |
| 3. DOSY NMR.....                                     | 36 |
| 4. UV and Fluorescence analyses .....                | 37 |
| 5. Singlet oxygen generation.....                    | 39 |
| 6. PDT on cells.....                                 | 40 |
| 7. ROS production in cells.....                      | 41 |
| 8. Cellular uptake kinetics.....                     | 42 |

## 1. Preparation of Zn-TPP-Ald

**TPP-Ald** was solubilized in refluxing THF, and  $\text{Zn}(\text{OAc})_2$  (5 equivalents) was added. After 3 hours, the solvent was removed and the crude material was solubilized in dichloromethane and filtered on silica gel to obtain the desired **Zn-TPP-Ald**.  $^1\text{H}$  NMR (400 MHz, Acetone)  $\delta$  10.43 (s, 4H), 8.87 (s, 8H), 8.45 (d,  $J = 7.9$  Hz, 8H), 8.37 (d,  $J = 8.3$  Hz, 8H). MS (ESI)  $m/z$  calculated  $\text{C}_{48}\text{H}_{28}\text{N}_4\text{O}_4\text{Zn}$   $[\text{M}]^+$ : 788.14; observed: 788.10.

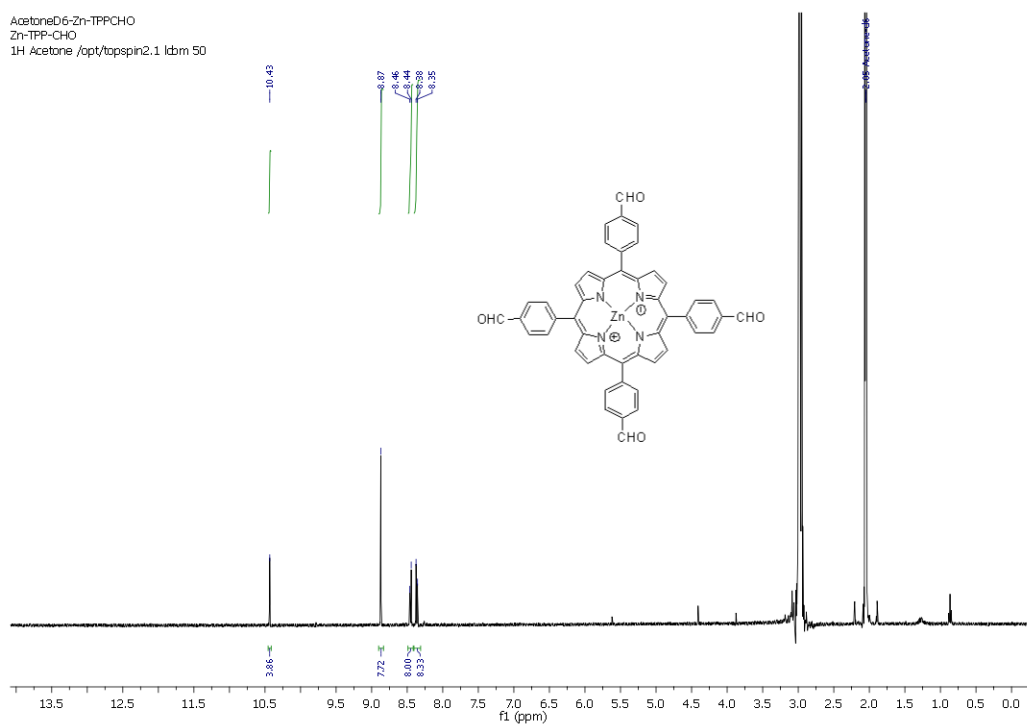

Figure S1:  $^1\text{H}$  NMR spectrum of Zn-TPP-Ald.

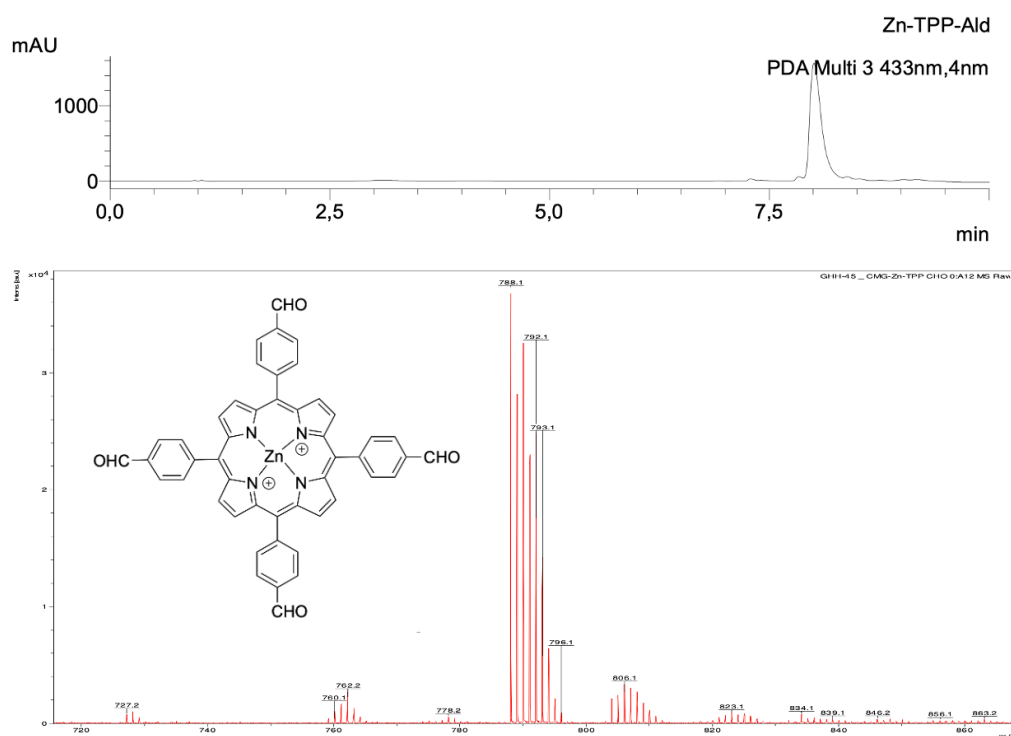

Figure S2: HPLC chromatogram (top) and mass spectrometry analysis (bottom) of Zn-TPP-Ald.

## 2. Peptide syntheses

### 2.1. Synthetic route

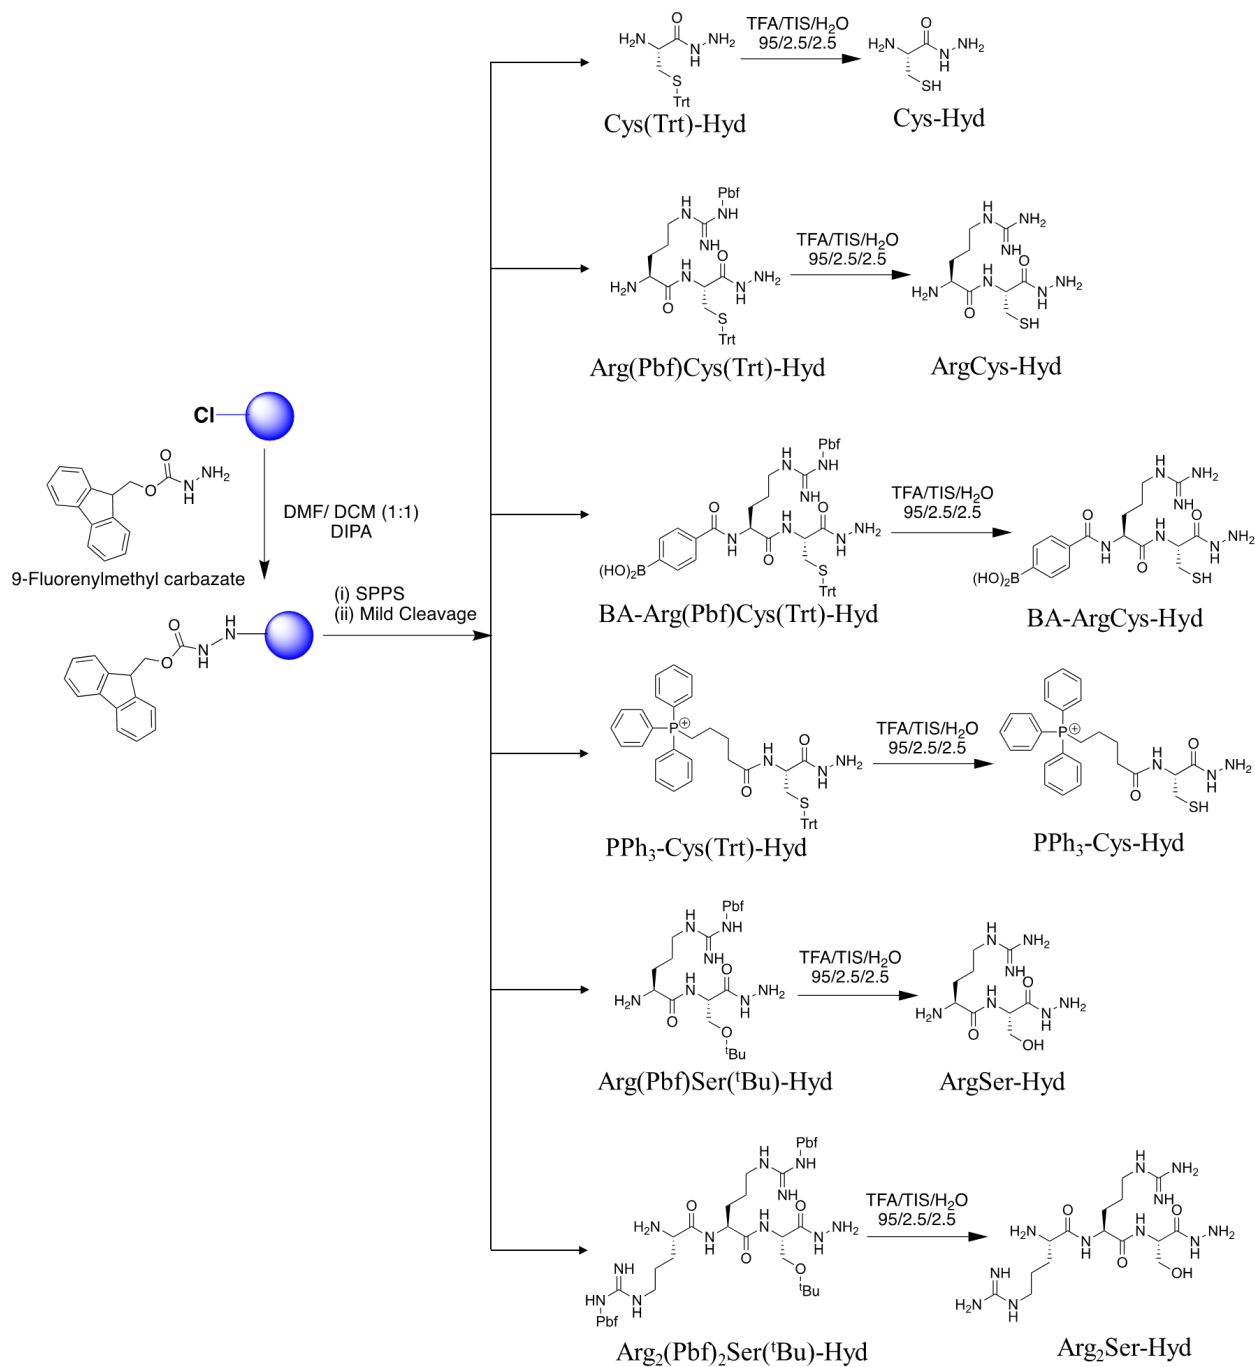

**Scheme S1:** Synthetic route used for preparing the protected and deprotected peptide hydrazide building blocks.

## 2.2. Characterization data

**Cys(Trt)-Hyd:** Isolated by preparative reverse-phase HPLC (linear gradient from 95/5 A/B eluents to 5/95 A/B eluents in 45 min).  $^1\text{H}$  NMR (400 MHz, MeOD)  $\delta$  7.44 – 7.40 (m, 6H), 7.34 (dd,  $J = 8.7, 6.7$  Hz, 6H), 7.29 – 7.25 (m, 3H), 3.59 (dd,  $J = 6.0, 3.9$  Hz, 1H,  $\text{H}_\alpha$ ), 2.69 (dd,  $J = 12.4, 7.3$  Hz, 1H,  $\text{H}_\beta$ ), 2.58 (dd,  $J = 12.4, 6.5$  Hz, 1H,  $\text{H}_\beta$ ). MS (ESI)  $m/z$  calculated  $\text{C}_{22}\text{H}_{23}\text{N}_3\text{OS}$   $[\text{M}+\text{H}]^+$ : 378.168; observed: 378.10.

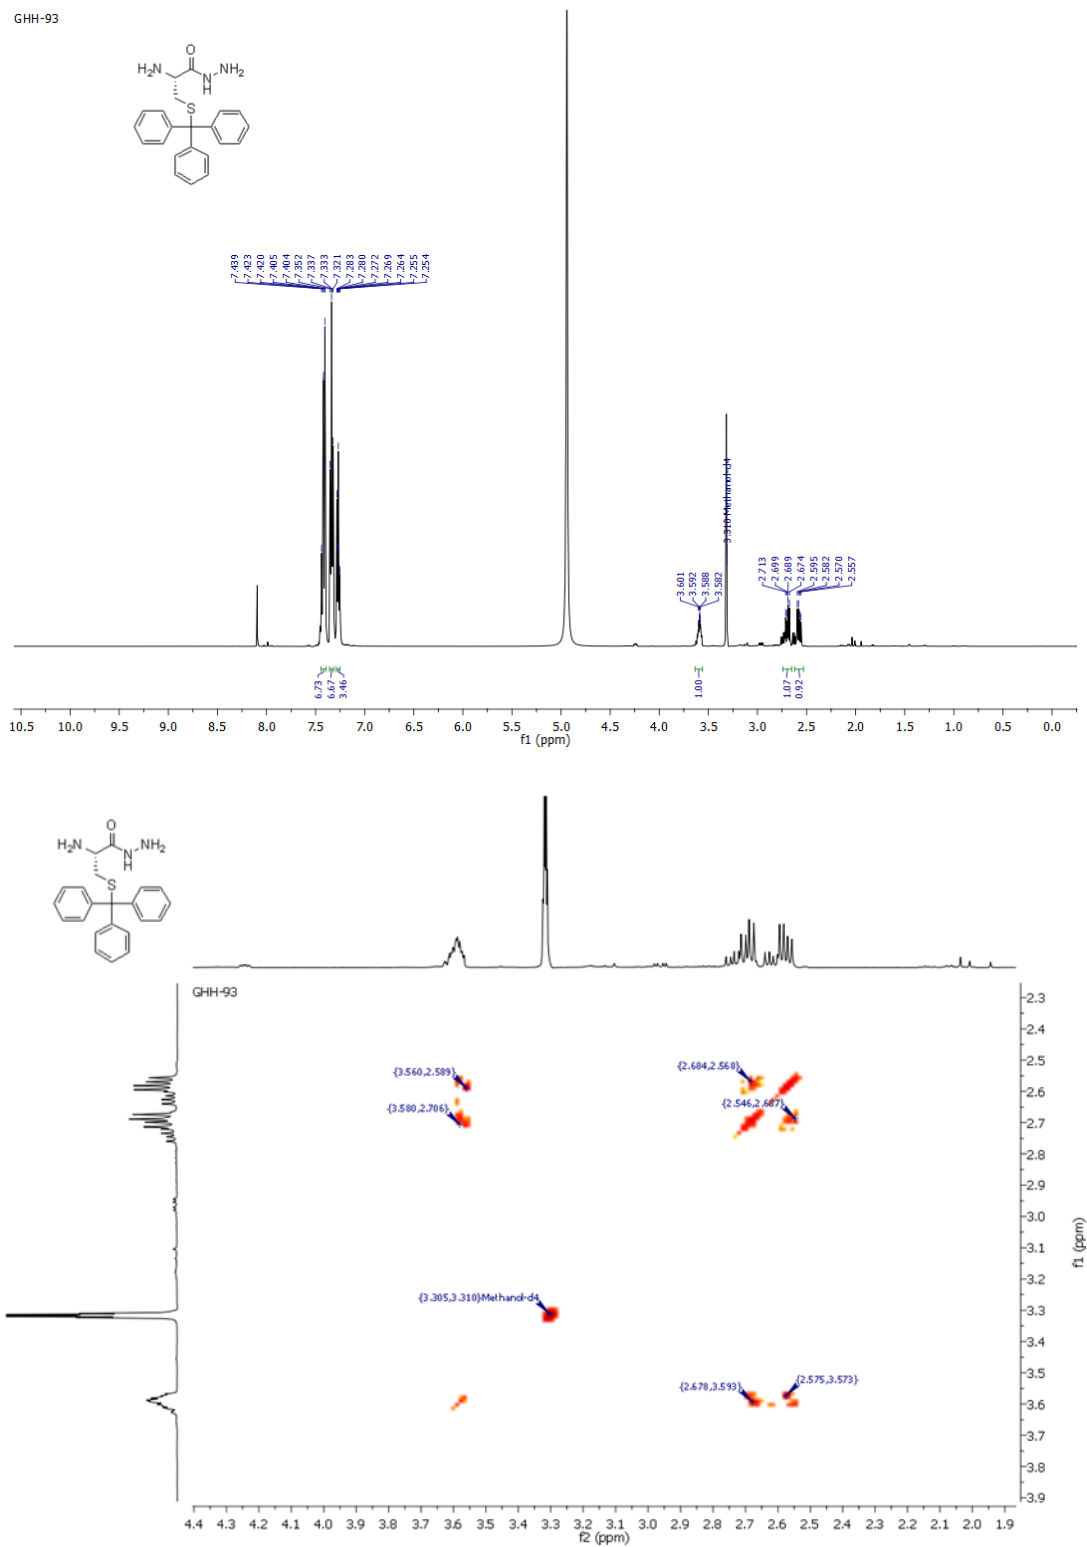

**Figure S3:**  $^1\text{H}$  NMR (top) and COSY NMR (bottom) spectra of **Cys(Trt)-Hyd**.

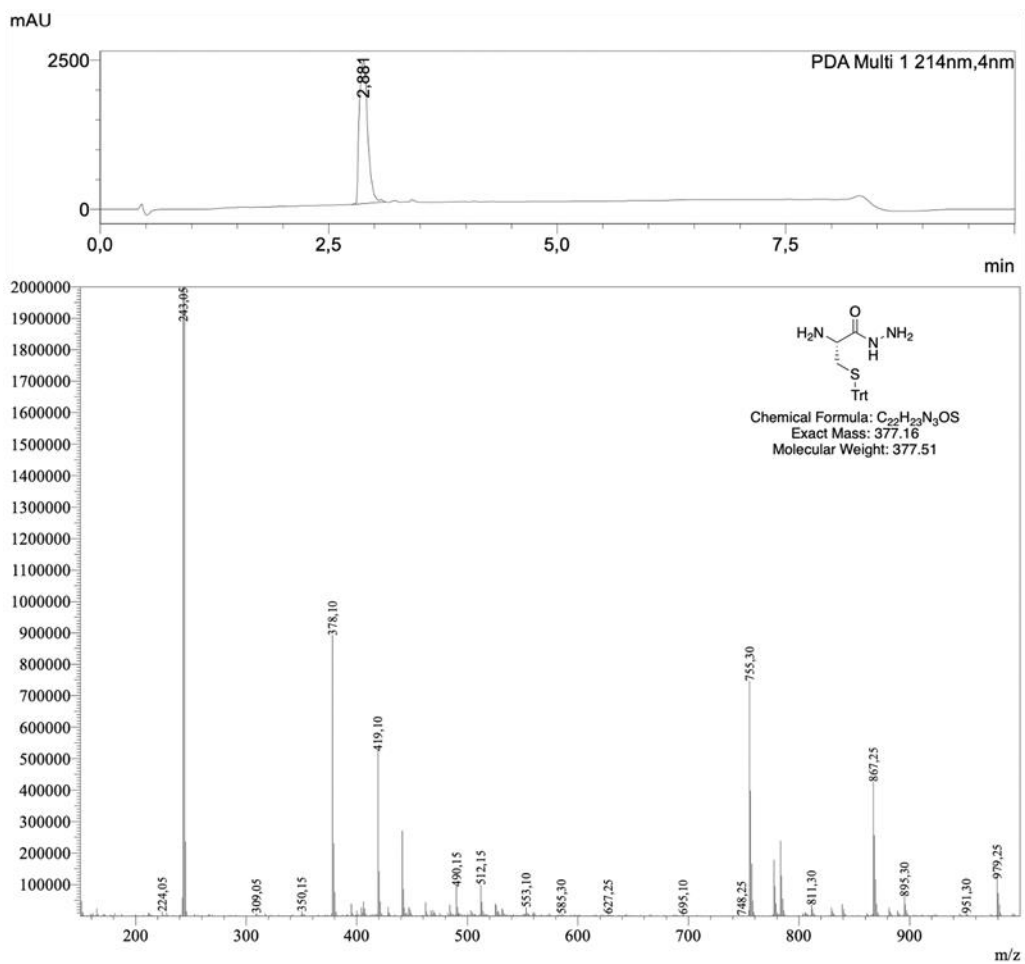

**Figure S4:** HPLC chromatogram (top) and mass spectrometry analysis (bottom) of **Cys(Trt)-Hyd**.

**Cys-Hyd:**  $^1\text{H}$  NMR (400 MHz,  $\text{D}_2\text{O}$ )  $\delta$  4.35 (t,  $J = 5.7$  Hz) & 4.17 (t,  $J = 6.0$  Hz) (1H), 3.18 – 2.98 (m, 2H). MS (ESI)  $m/z$  calculated  $\text{C}_3\text{H}_9\text{N}_3\text{OS}$   $[\text{M}+\text{H}]^+$ : 136.058; observed: 136.06.

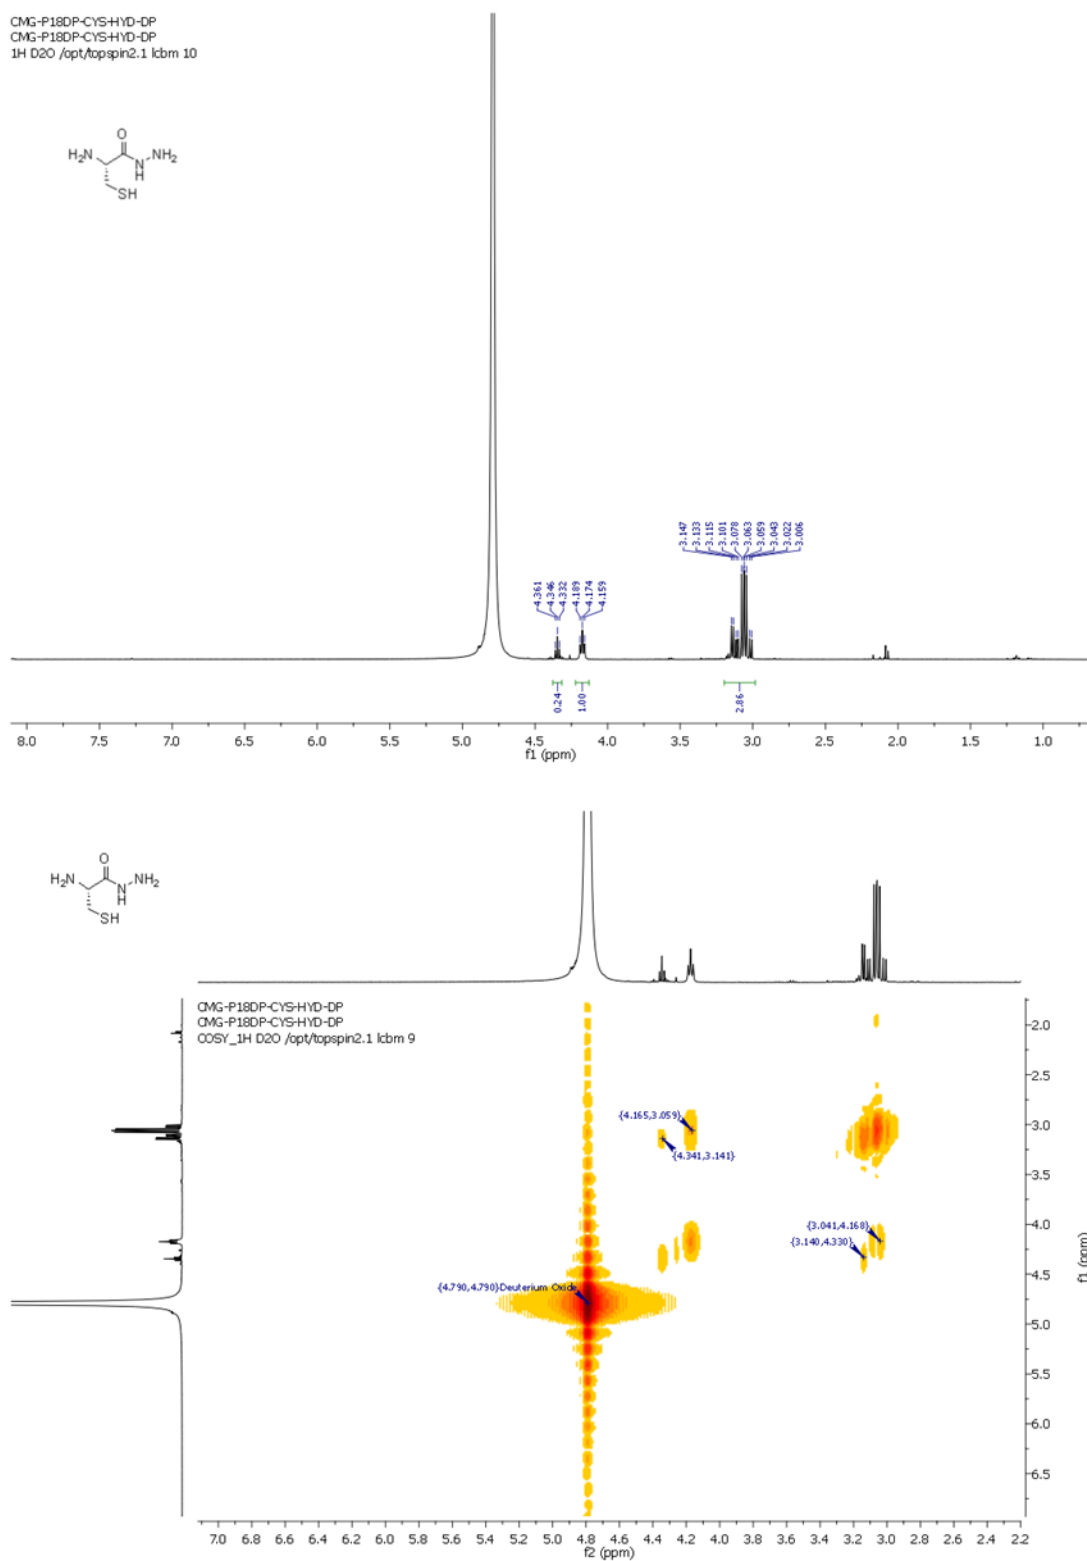

**Figure S5:**  $^1\text{H}$  NMR (top) and COSY NMR (bottom) spectra of **Cys-Hyd**.

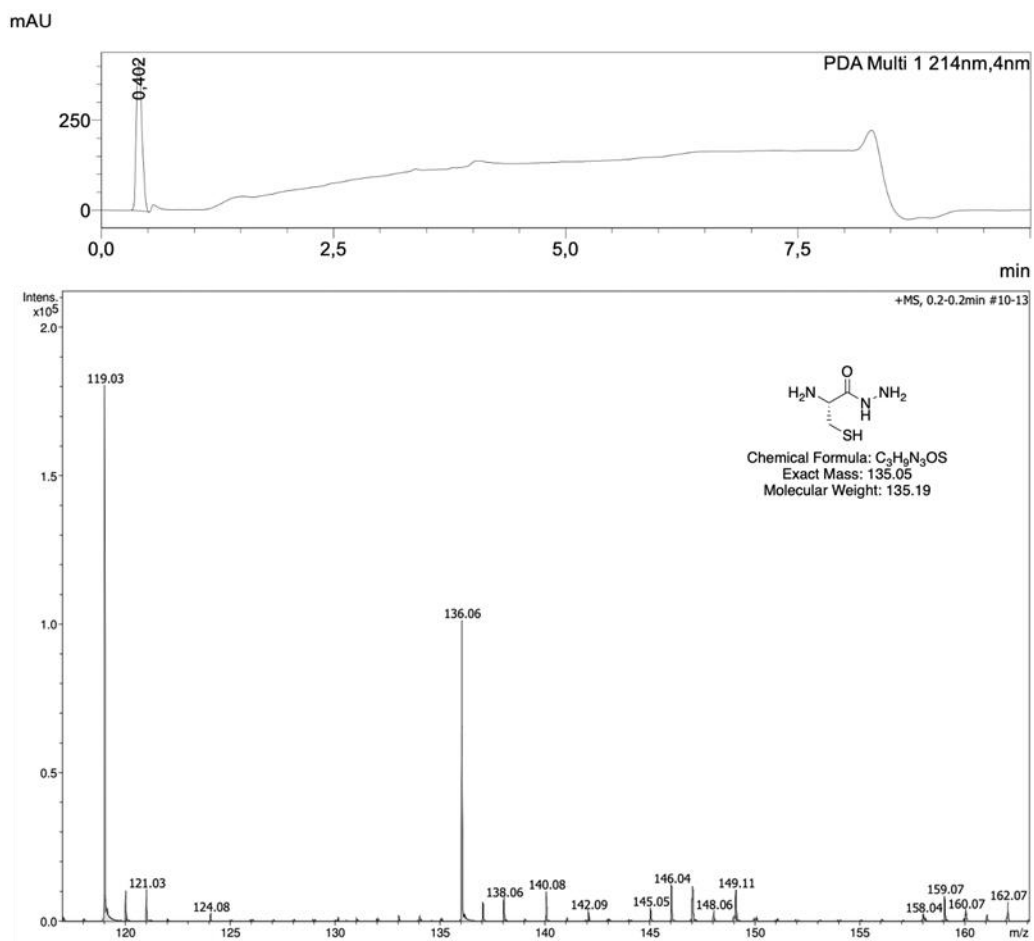

**Figure S6:** HPLC chromatogram (top) and mass spectrometry analysis (bottom) of **Cys-Hyd**.



**Arg(Pbf)Cys(Trt)-Hyd:** Isolated by preparative reverse-phase HPLC (linear gradient from 95/5 A/B eluents to 5/95 A/B eluents in 30 min, keeping this composition for 10 more min).  $^1\text{H}$  NMR (400 MHz,  $\text{CD}_3\text{OD}$ )  $\delta$  7.35 (t,  $J = 1.8$  Hz, 2H), 7.33 (dd,  $J = 1.5, 0.9$  Hz, 4H), 7.28 (t,  $J = 1.5$  Hz, 2H), 7.26 (t,  $J = 2.0$  Hz, 2H), 7.25 – 7.23 (m, 2H), 7.21 (t,  $J = 1.4$  Hz, 1H), 7.19 (t,  $J = 2.4$  Hz, 1H), 7.18 – 7.17 (m, 1H), 4.22 (t,  $J = 7.5$  Hz, 1H), 3.86 (t,  $J = 6.4$  Hz, 1H), 3.20 – 3.09 (m, 2H), 2.95 (s, 2H), 2.65 – 2.55 (m, 2H), 2.53 (s, 3H), 2.46 (s, 3H), 2.04 (s, 3H), 1.87 – 1.75 (m, 2H), 1.65 – 1.50 (m, 2H), 1.41 (s, 6H). MS (ESI)  $m/z$  calculated  $\text{C}_{41}\text{H}_{51}\text{N}_7\text{O}_5\text{S}_2$ ;  $[\text{M}+\text{H}]^+$ : 786.348; observed: 786.40.

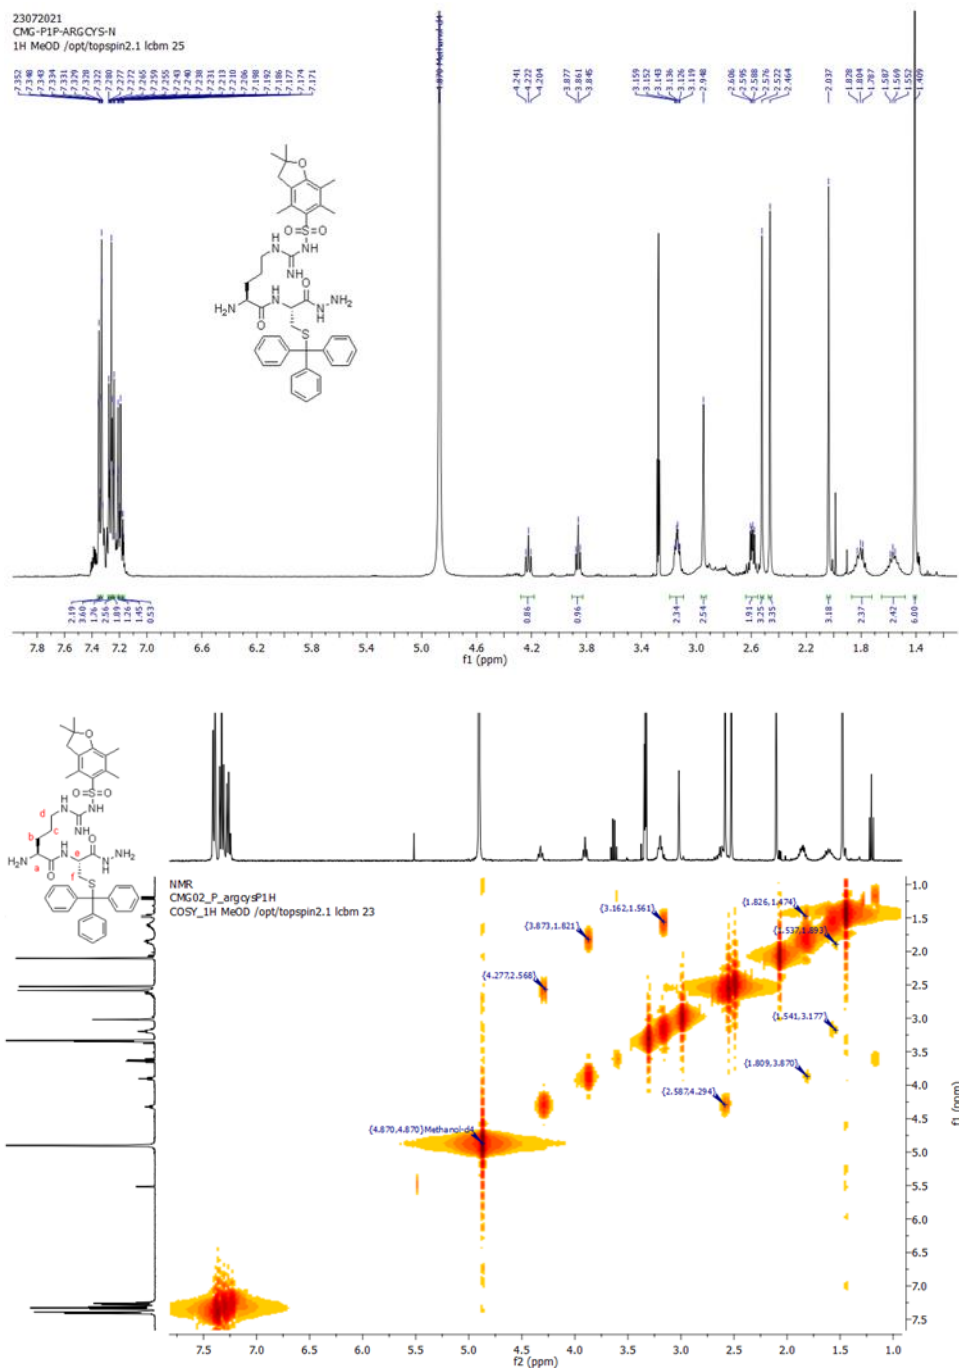

**Figure S7:**  $^1\text{H}$  NMR (top) and COSY NMR (bottom) spectra of **Arg(Pbf)Cys(Trt)-Hyd**.

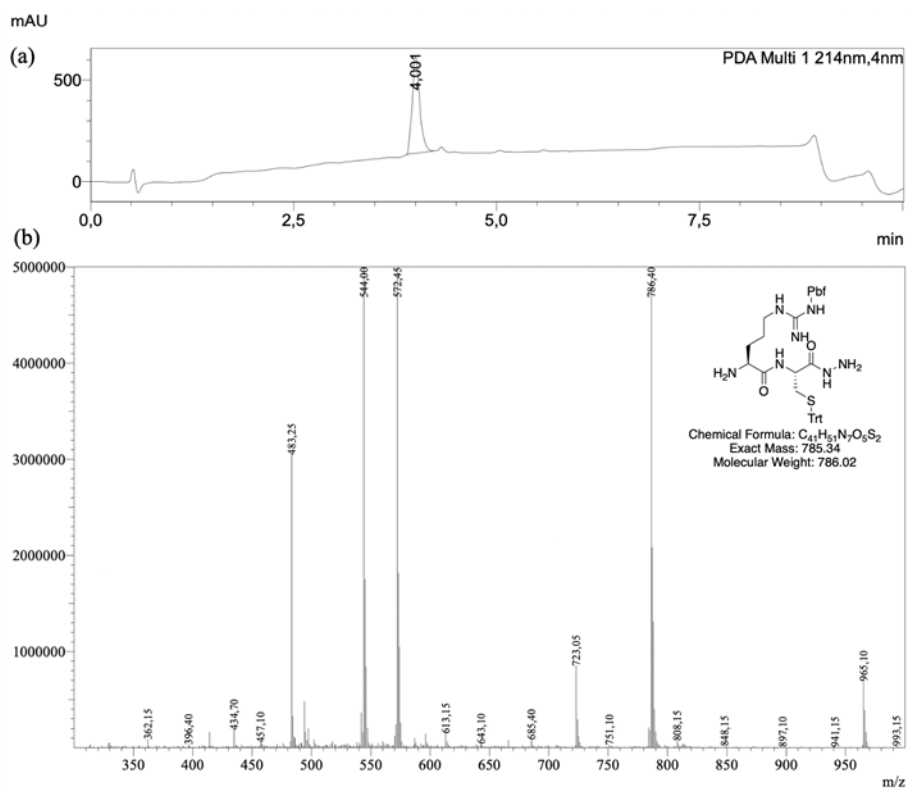

**Figure S8:** HPLC chromatogram (top) and mass spectrometry analysis (bottom) of Arg(Pbf)Cys(Trt)-Hyd.

**Arg-Cys-Hyd:**  $^1\text{H}$  NMR (400 MHz,  $\text{D}_2\text{O}$ )  $\delta$  4.63 (t,  $J = 5.1$  Hz) & 4.50 (t,  $J = 6.7$  Hz) (1H), 4.09 (t,  $J = 5.4$  Hz, 1H), 3.22 (t,  $J = 5.9$  Hz, 2H), 3.05 – 2.81 (m, 2H), 1.94 (m, 2H), 1.65 (m, 2H). MS (ESI)  $m/z$  calculated  $\text{C}_9\text{H}_{21}\text{N}_7\text{O}_2\text{S}$ ;  $[\text{M}+\text{H}]^+$ : 292.155; observed: 291.70.

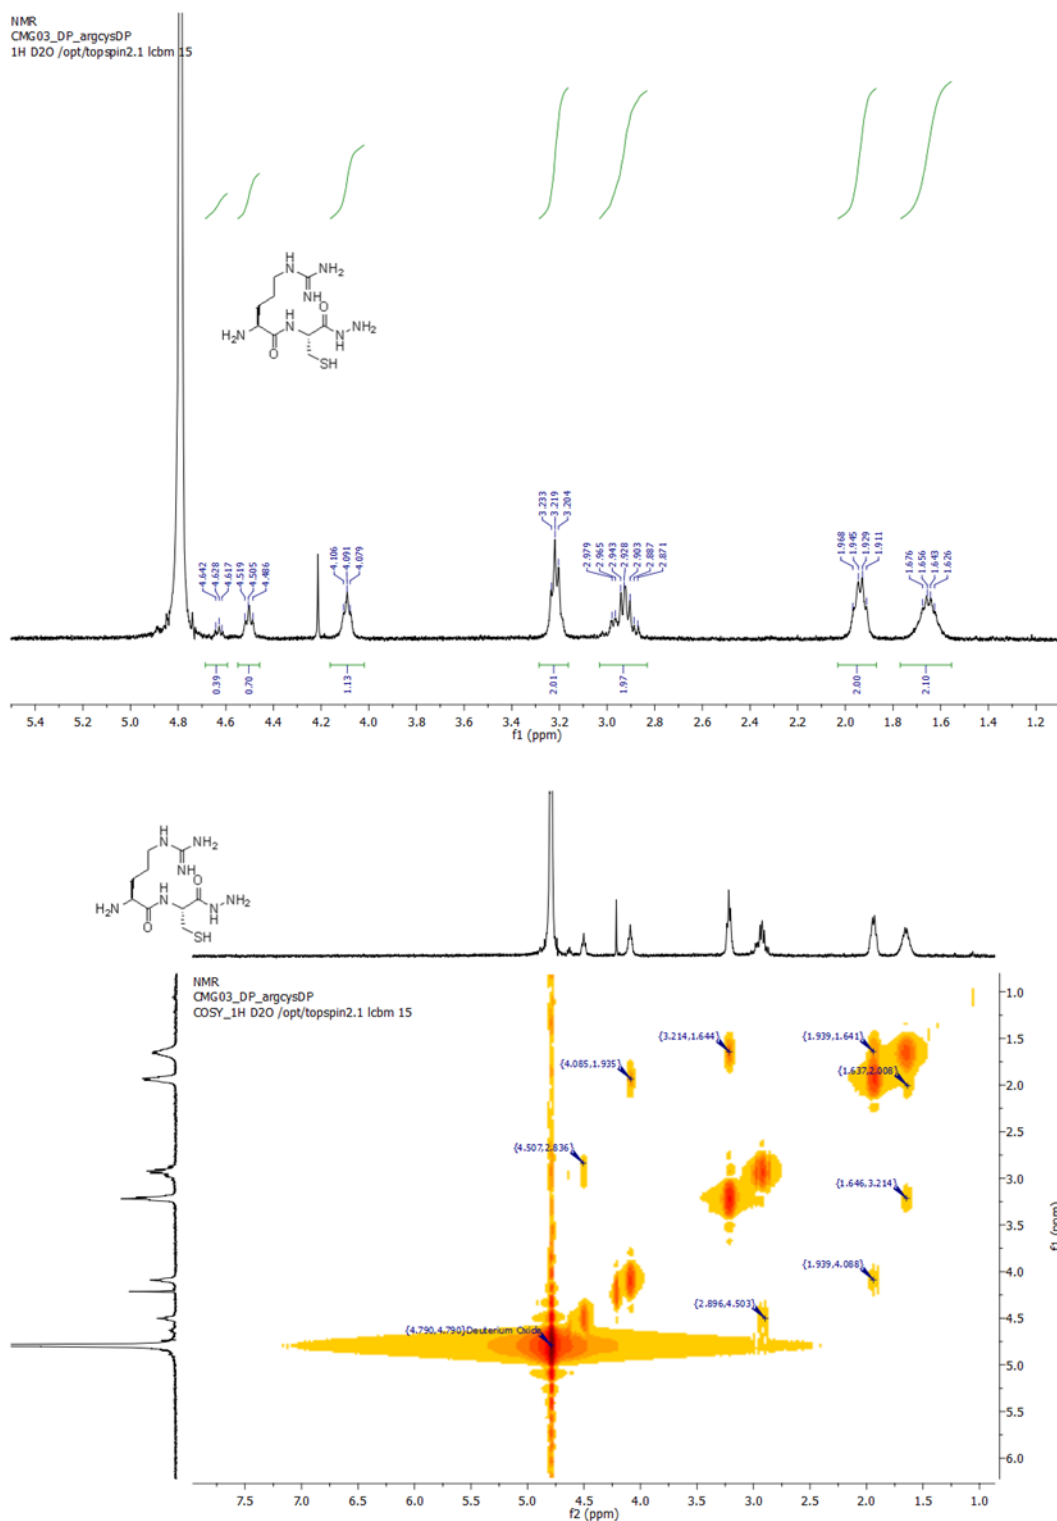

**Figure S9:**  $^1\text{H}$  NMR (top) and COSY NMR (bottom) spectra of ArgCys-Hyd.

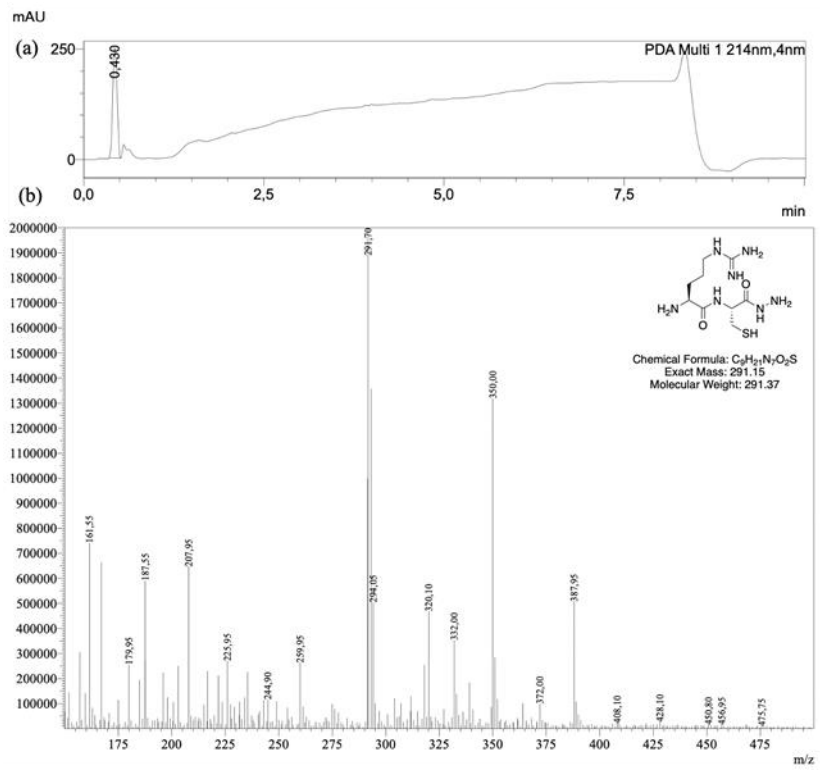

**Figure S10:** HPLC chromatogram (top) and mass spectrometry analysis (bottom) of **ArgCys-Hyd**.

**BA-Arg(Pbf)Cys(Trt)-Hyd** : Isolated by preparative reverse-phase HPLC (linear gradient from 80/20 A/B eluents to 5/95 A/B eluents in 30 min, keeping this composition for 10 more min).  $^1\text{H}$  NMR (400 MHz,  $\text{CD}_3\text{OD}$ )  $\delta$  7.82 (d,  $J = 8.2$  Hz, 2H), 7.75 (br, 2H), 7.36 – 7.33 (m, 6H), 7.27 – 7.17 (m, 9H), 4.51 (dd,  $J = 8.6, 5.9$  Hz, 1H), 4.10 (t,  $J = 7.2$  Hz, 1H), 3.27 – 3.13 (m, 2H), 2.95 (s, 2H), 2.71 – 2.61 (m, 2H), 2.55 (s, 3H), 2.49 (s, 3H), 1.95 – 1.75 (m, 2H), 1.71 – 1.55 (m, 2H), 1.42 (s, 6H). MS (ESI)  $m/z$  calculated  $\text{C}_{48}\text{H}_{56}\text{BN}_7\text{O}_8\text{S}_2$ ;  $[\text{M}+\text{H}]^+$ : 934.378; observed: 934.25.

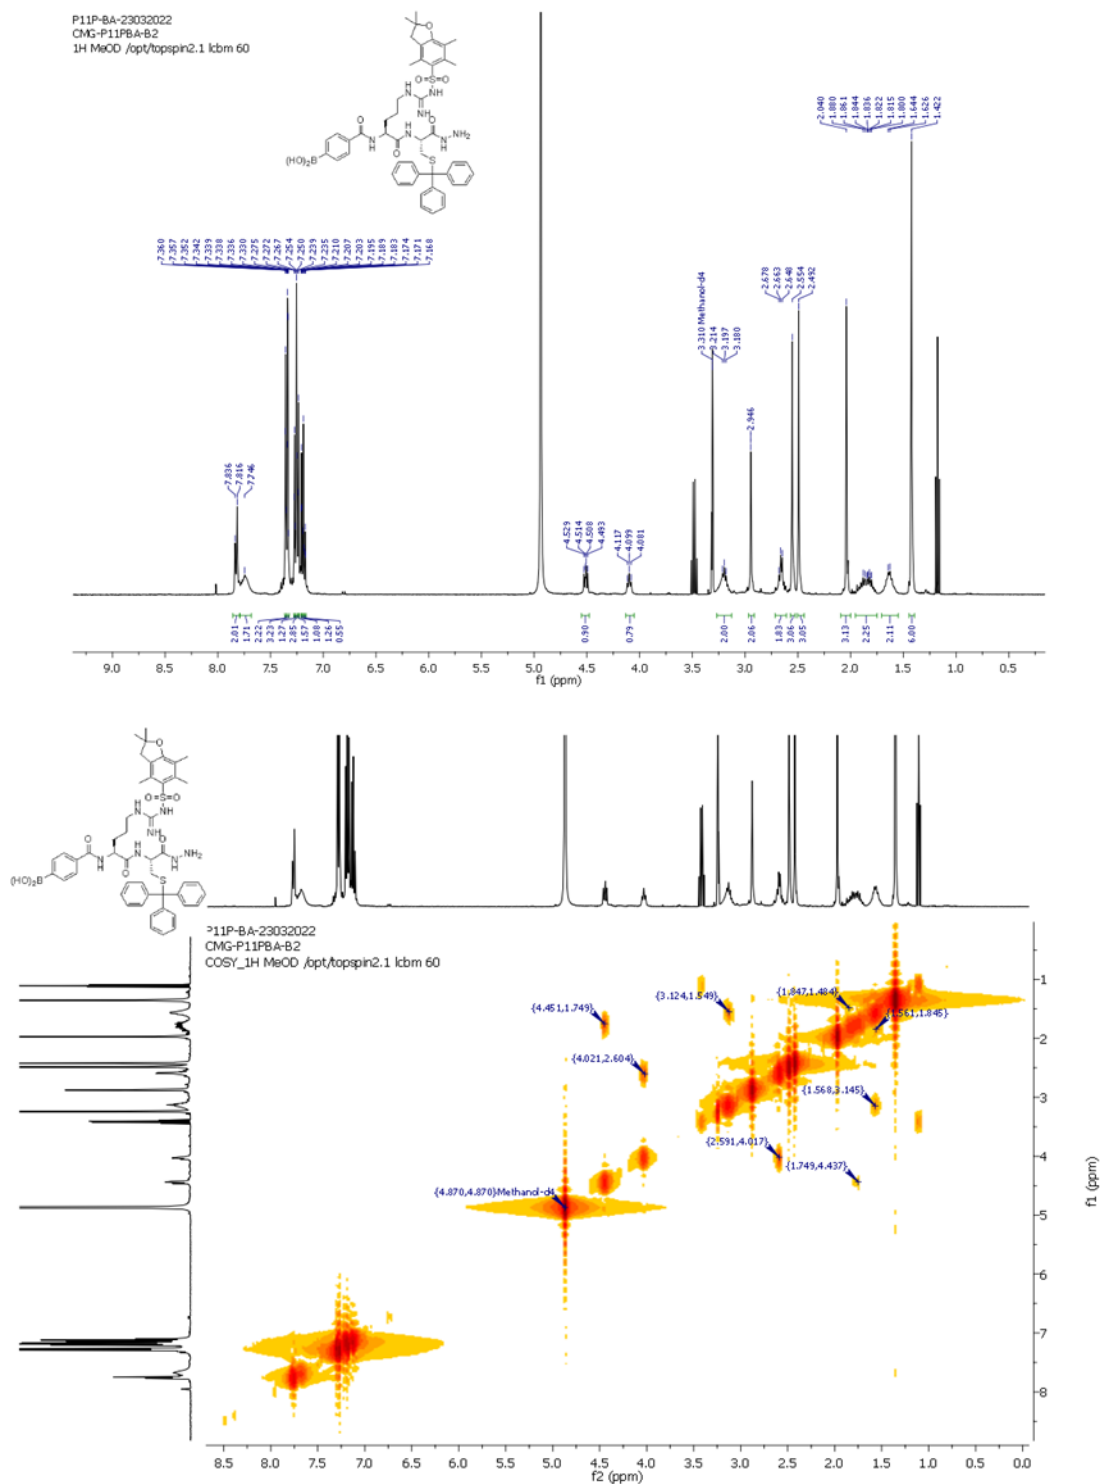

**Figure S11:**  $^1\text{H}$  NMR (top) and COSY NMR (bottom) spectra of **BA-Arg(Pbf)Cys(Trt)-Hyd**.

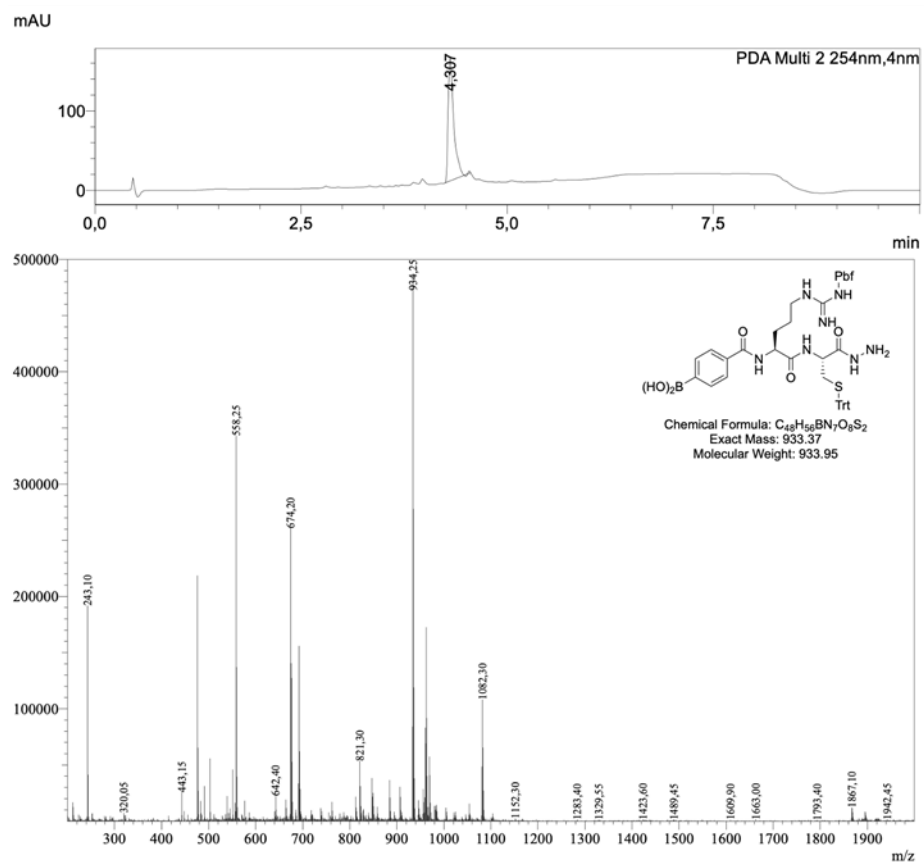

**Figure S12:** HPLC chromatogram (top) and mass spectrometry analysis (bottom) of **BA-Arg(Pbf)Cys(Trt)-Hyd**.

**BA-ArgCys-Hyd:**  $^1\text{H}$  NMR (400 MHz,  $\text{D}_2\text{O}$ )  $\delta$  7.85 (dt,  $J = 6.4, 2.0, 2\text{H}$ ), 7.78 (dt,  $J = 8.4, 2.0, 2\text{H}$ ), 4.55 (ddd,  $J = 8.7, 6.0, 3.6$  Hz, 2H), 3.24 (t,  $J = 6.9$  Hz, 2H), 2.95 (dq,  $J = 14.1, 6.7$  Hz, 2H), 2.01 – 1.83 (m, 2H), 1.80 – 1.64 (m, 2H). MS (ESI)  $m/z$  calculated  $\text{C}_{16}\text{H}_{26}\text{N}_7\text{O}_5\text{S}$   $[\text{M}+\text{H}]^+$ : 440.18; observed: 441.15.

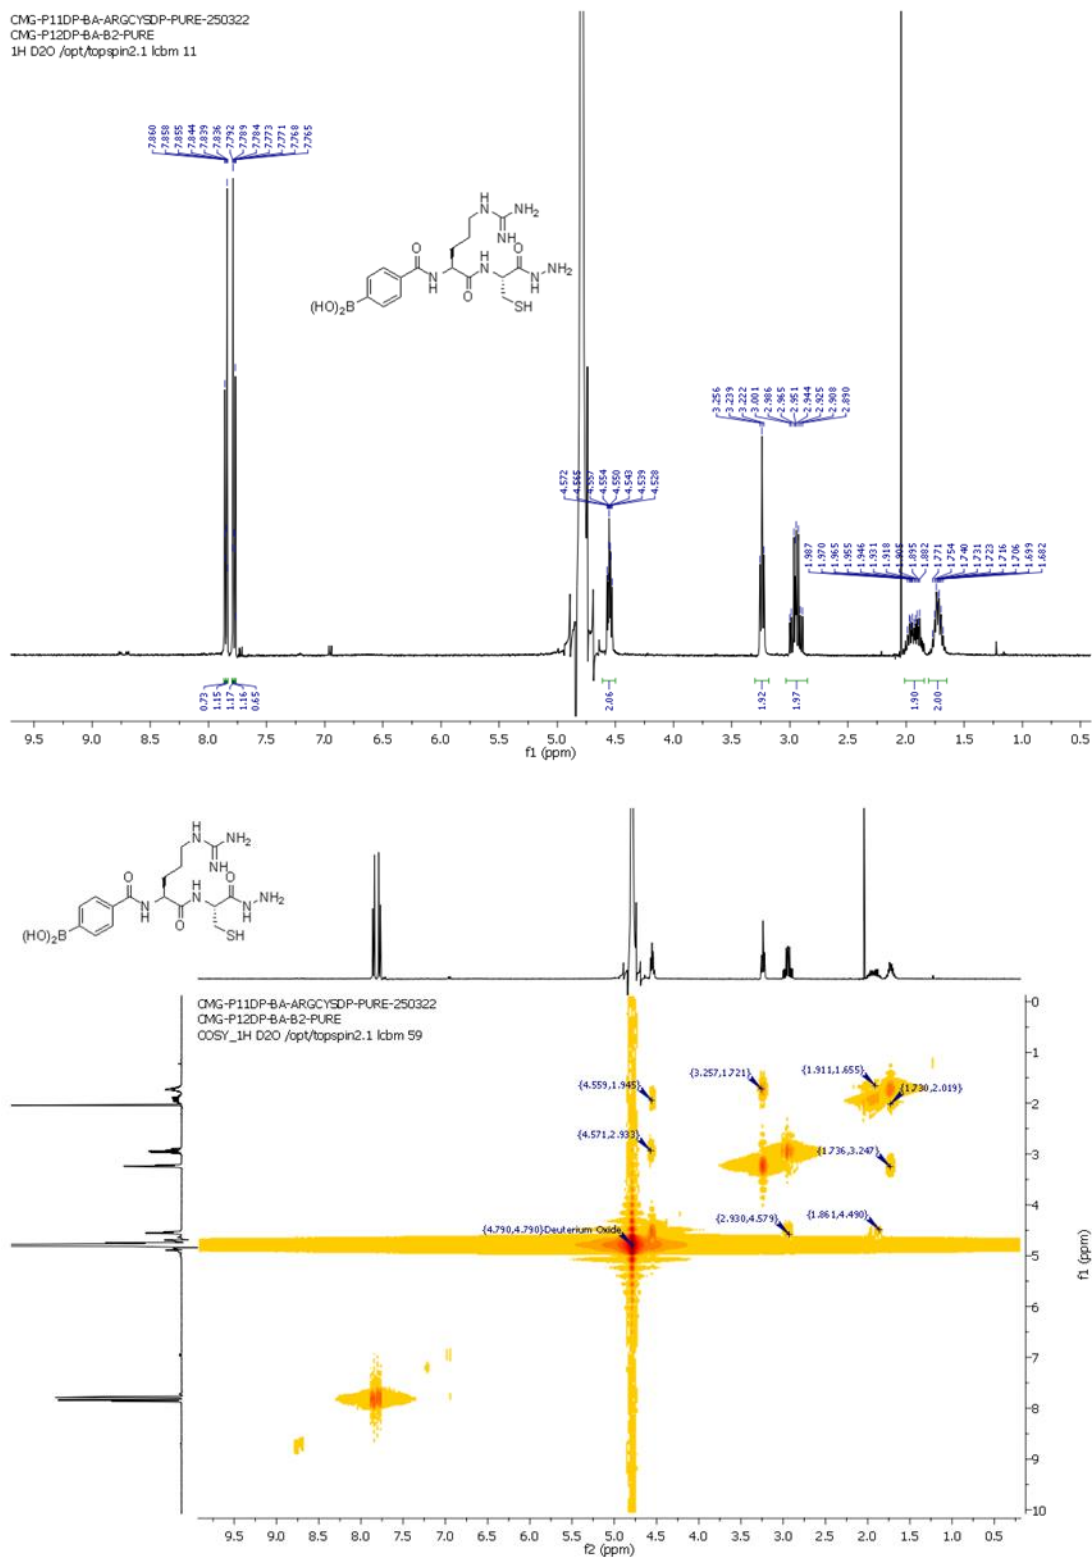

**Figure S13:**  $^1\text{H}$  NMR (top) and COSY NMR (bottom) spectra of BA-ArgCys-Hyd.

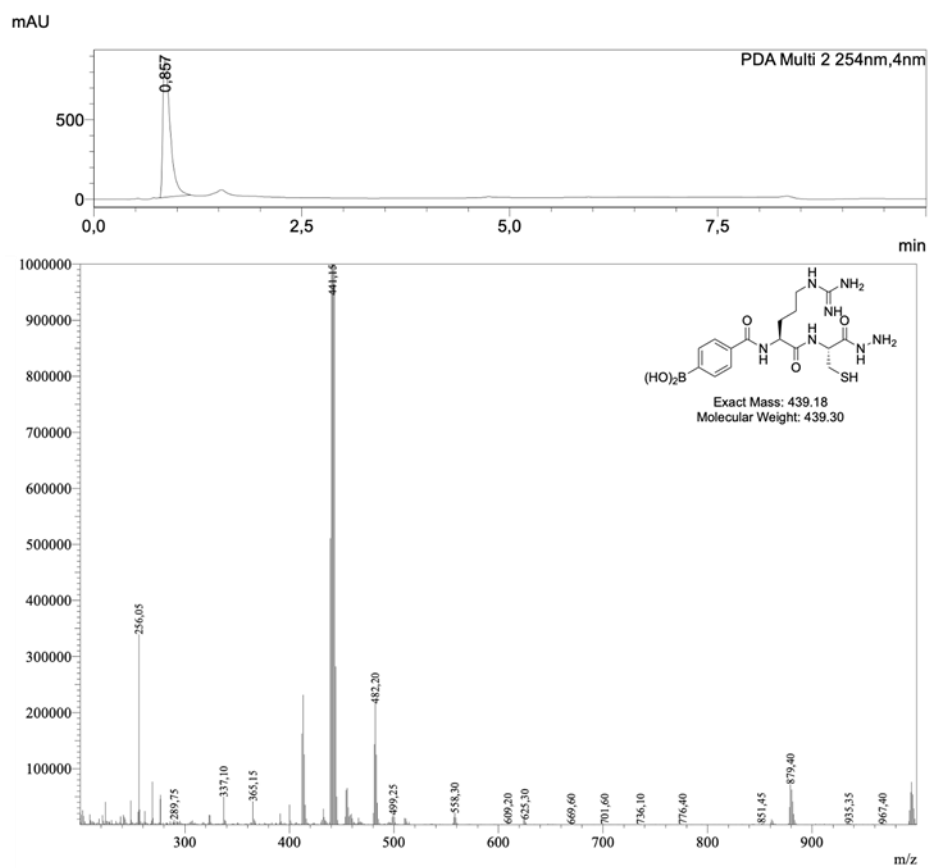

**Figure S14:** HPLC chromatogram (top) and mass spectrometry analysis (bottom) of **BA-ArgCys-Hyd**.



**PPh<sub>3</sub>-Cys(Trt)-Hyd:** Isolated by preparative reverse-phase HPLC (linear gradient from 95/5 A/B eluents to 5/95 A/B eluents in 40 min). <sup>1</sup>H NMR (400 MHz, CD<sub>3</sub>OD) δ 7.89 – 7.83 (m, 3H), 7.80 – 7.76 (m, 4H), 7.76 – 7.69 (m, 8H), 7.37 – 7.33 (m, 6H), 7.25 (dt, *J* = 13.8, 4.8 Hz, 6H), 7.21 (dt, *J* = 9.5, 4.2 Hz, 3H), 4.16 (dd, *J* = 7.9, 6.7 Hz, 1H), 3.51 – 3.33 (m, 2H), 2.66 – 2.54 (m, 2H), 2.29 (q, *J* = 7.7 Hz, 2H), 1.84 (m, 2H), 1.70 (m, 2H). MS (ESI) *m/z* calculated C<sub>45</sub>H<sub>45</sub>N<sub>3</sub>O<sub>2</sub>PS [M+H]<sup>+</sup>: 723.308; observed: 722.15.

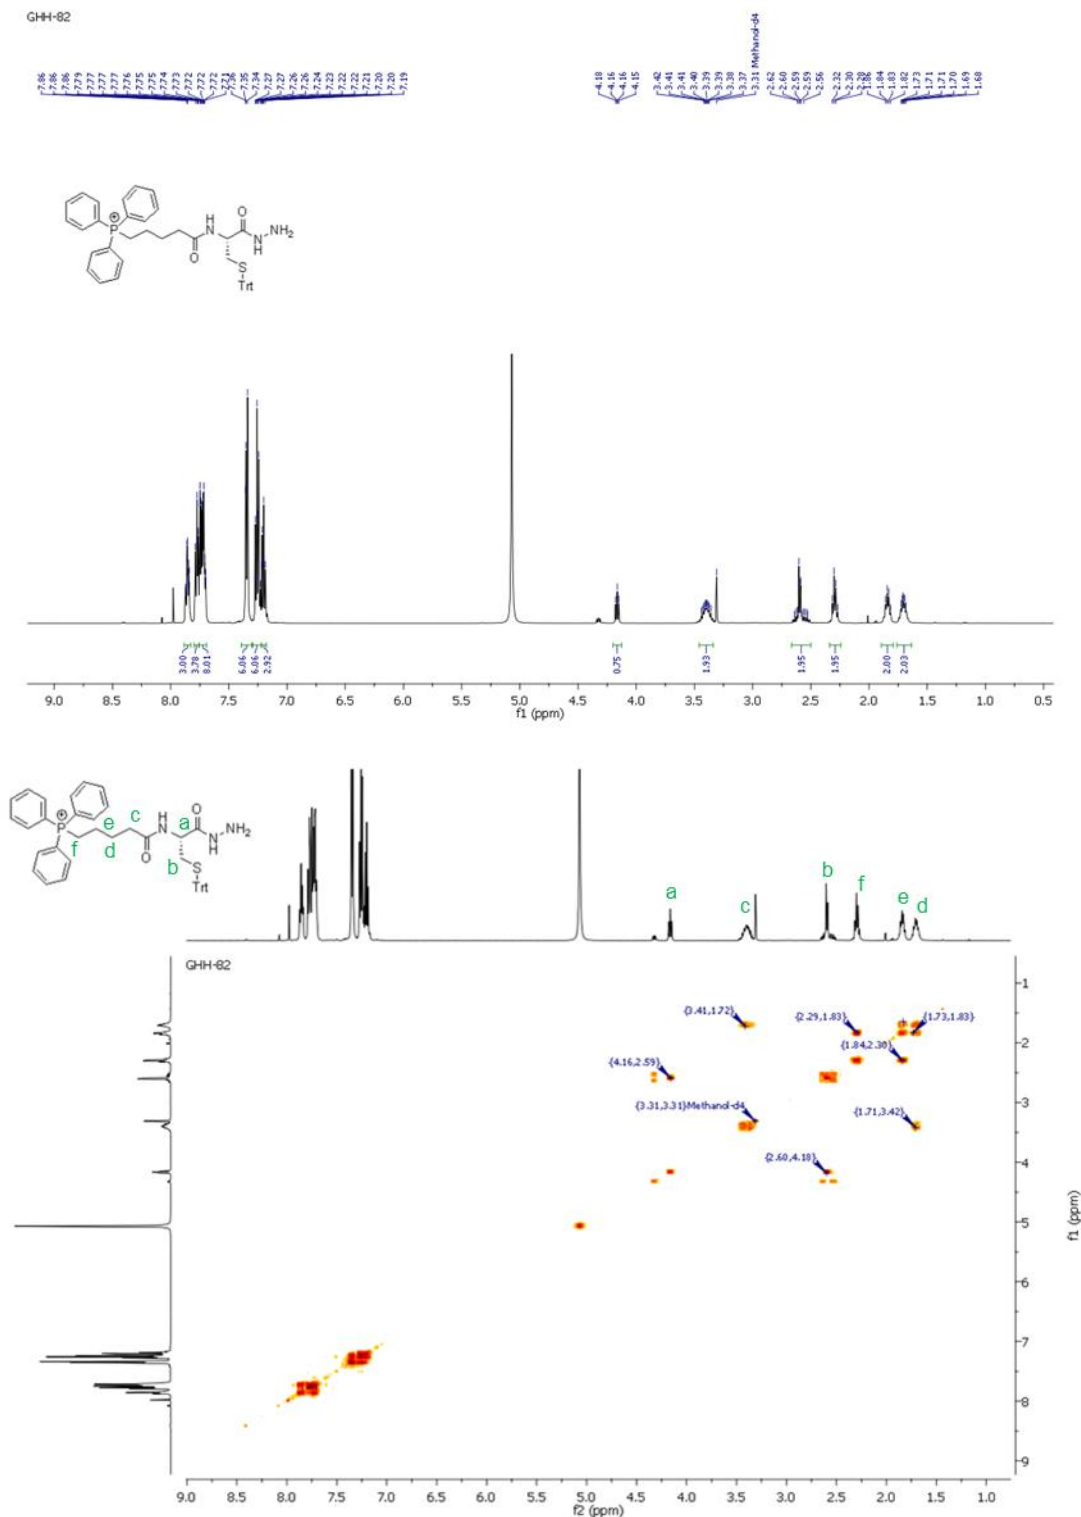

**Figure S15:** <sup>1</sup>H NMR (top) and COSY NMR (bottom) spectra of PPh<sub>3</sub>-Cys(Trt)-Hyd.

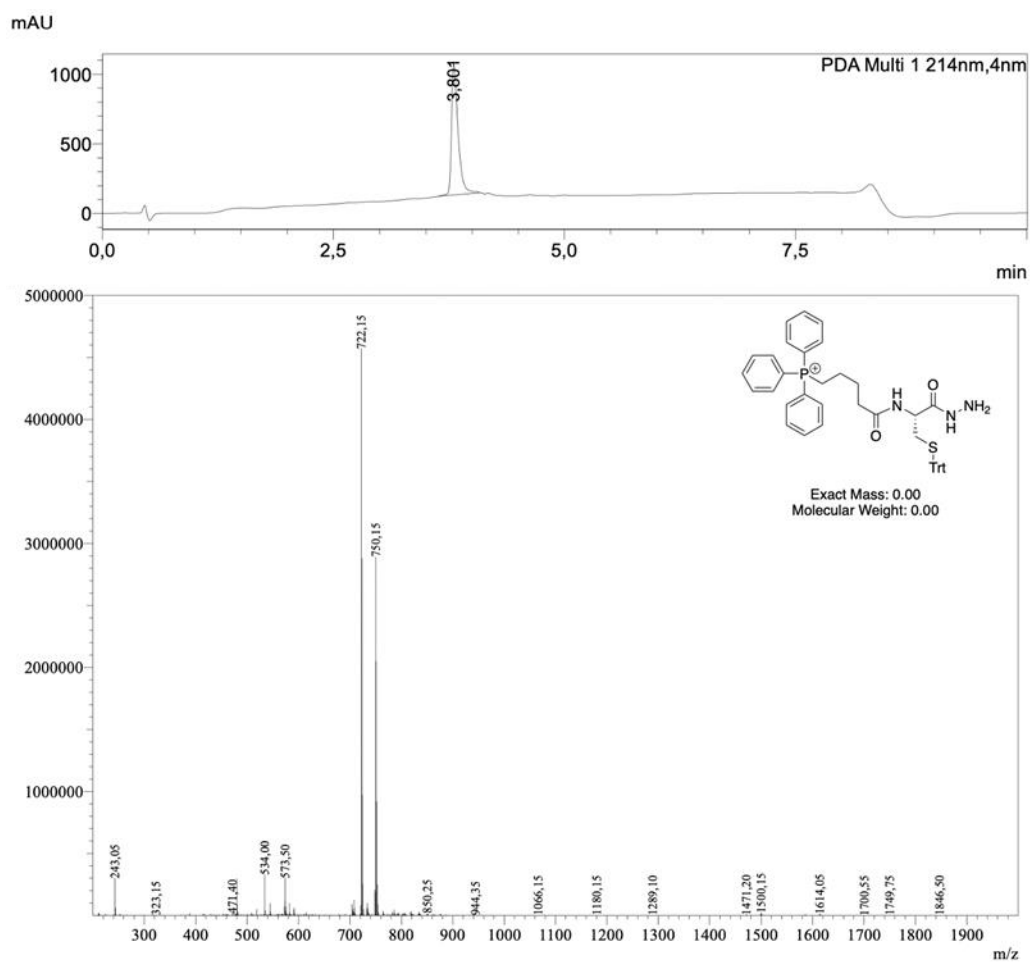

**Figure S16:** HPLC chromatogram (top) and mass spectrometry analysis (bottom) of **PPh<sub>3</sub>-Cys(Trt)-Hyd**.

**PPh<sub>3</sub>-Cys-Hyd**: <sup>1</sup>H NMR (400 MHz, D<sub>2</sub>O) δ 7.70 (dd, *J* = 5.5, 1.7 Hz, 3H), 7.63 – 7.49 (m, 12H), 4.38 (dd, *J* = 8.1, 5.2 Hz, 1H), 3.17 (br, 2H), 2.72 (ddd, *J* = 22.3, 14.2, 6.7 Hz, 2H), 2.25 (m, 2H), 1.71 (br, 2H), 1.58 (br, 2H). MS (ESI) *m/z* calculated C<sub>26</sub>H<sub>31</sub>N<sub>3</sub>O<sub>2</sub>PS [M+H]<sup>+</sup>: 481.198; observed: 480.15.

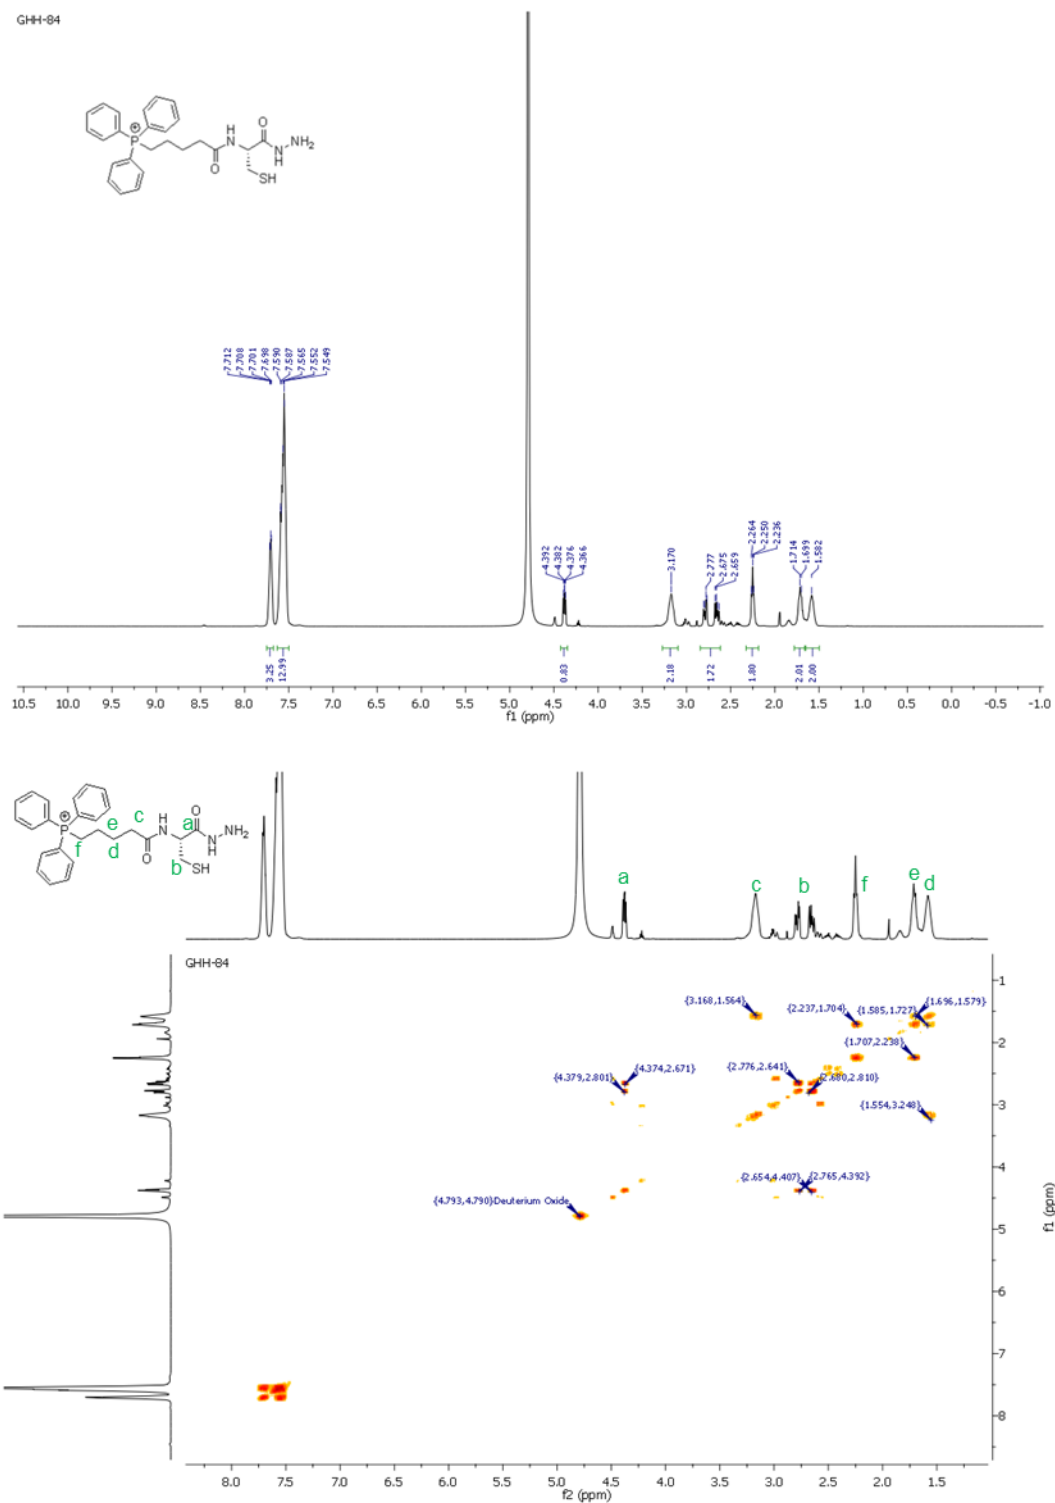

**Figure S17:** <sup>1</sup>H NMR (top) and COSY NMR (bottom) spectra of PPh<sub>3</sub>-Cys-Hyd.

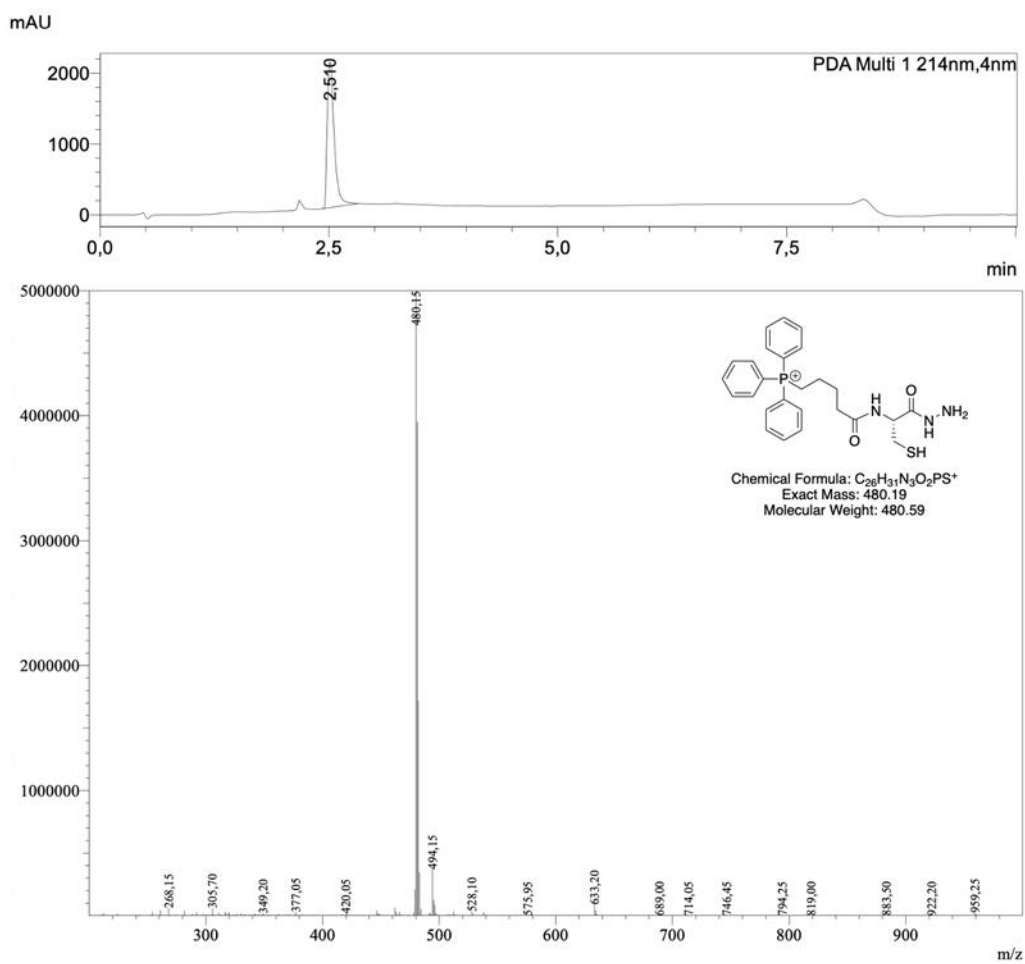

Figure S18: HPLC chromatogram (top) and mass spectrometry analysis (bottom) of PPh<sub>3</sub>-Cys-Hyd.

**Arg(Pbf)Ser(tBu)-Hyd:** Isolated by preparative reverse-phase HPLC (linear gradient from 95/5 A/B eluents to 5/95 A/B eluents in 30 min, keeping this composition for 10 more min).  $^1\text{H}$  NMR (400 MHz,  $\text{CD}_3\text{OD}$ ) :  $\delta$  4.56 (t,  $J = 5.8$  Hz, 1H), 4.01 (t,  $J = 6.4$  Hz, 1H), 3.67 (qd,  $J = 9.2, 5.8$  Hz, 2H), 3.21 (t,  $J = 6.6$  Hz, 2H), 3.00 (s, 2H), 2.57 (s, 3H), 2.51 (s, 3H), 2.08 (s, 3H), 1.91 (m, 2H), 1.64 (m, 2H), 1.45 (s, 6H), 1.20 (s, 9H). MS (ESI)  $m/z$  calculated  $\text{C}_{26}\text{H}_{45}\text{N}_7\text{O}_6\text{S}$ ;  $[\text{M}+\text{H}]^+$ : 584.328; observed: 584.55.

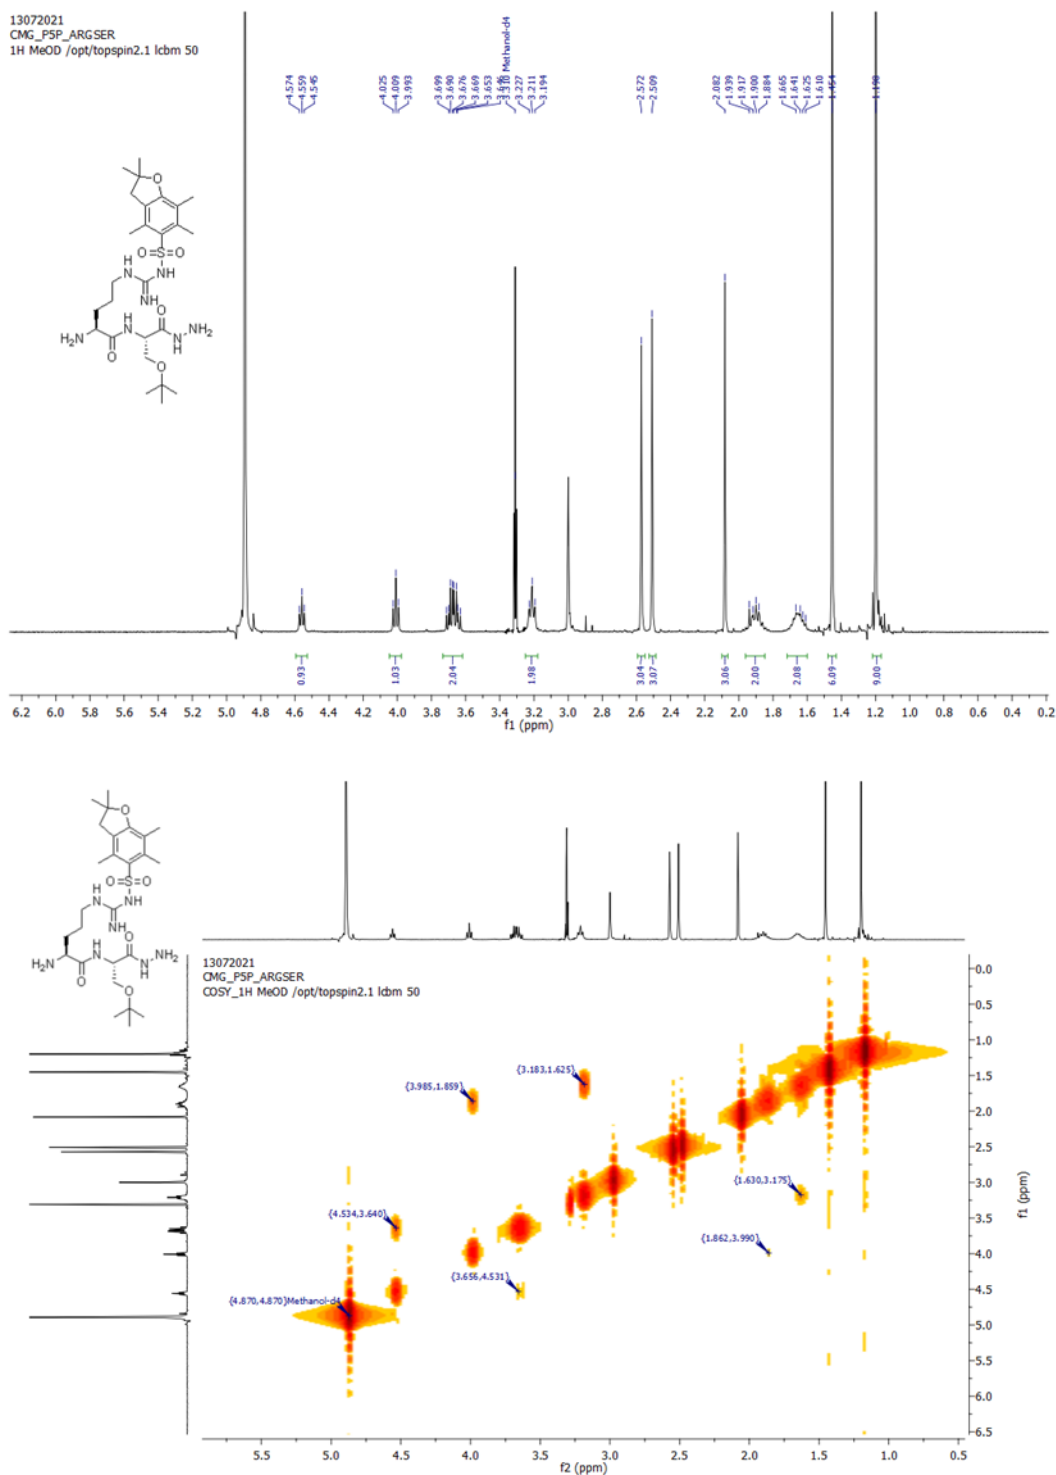

**Figure S19:**  $^1\text{H}$  NMR (top) and COSY NMR (bottom) spectra of **Arg(Pbf)Ser(tBu)-Hyd**.

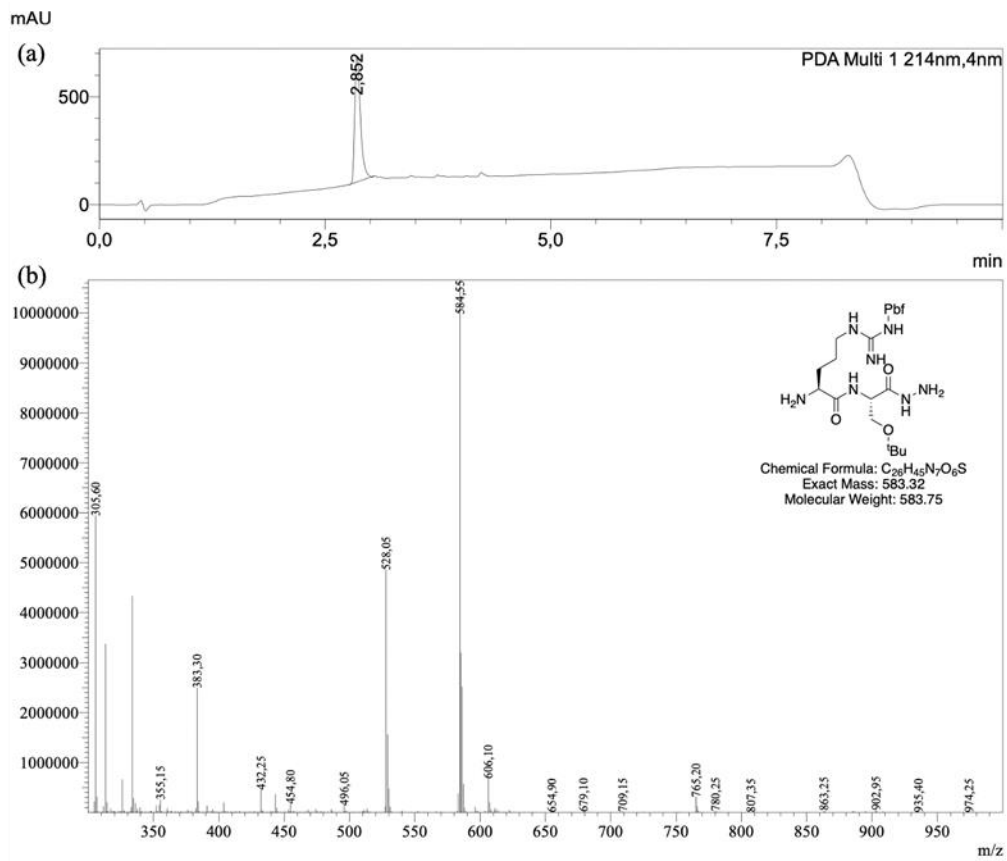

**Figure S20:** HPLC chromatogram (top) and mass spectrometry analysis (bottom) of **Arg(Pbf)Ser(tBu)-Hyd**.

**ArgSer-Hyd:**  $^1\text{H}$  NMR (400 MHz,  $\text{D}_2\text{O}$ ):  $\delta$  4.65 (t,  $J = 5.5$  Hz) & 4.54 (t,  $J = 5.4$  Hz) (1H), 4.14 (d,  $J = 2.5$  Hz, 1H), 3.98 – 3.86 (m, 2H), 3.26 (t,  $J = 6.6$  Hz, 2H), 2.05 – 1.91 (m, 2H), 1.79 – 1.61 (m, 2H). MS (ESI)  $m/z$  calculated  $\text{C}_9\text{H}_{21}\text{N}_7\text{O}_3$   $[\text{M}+\text{H}]^+$ : 276.178; observed: 276.00.

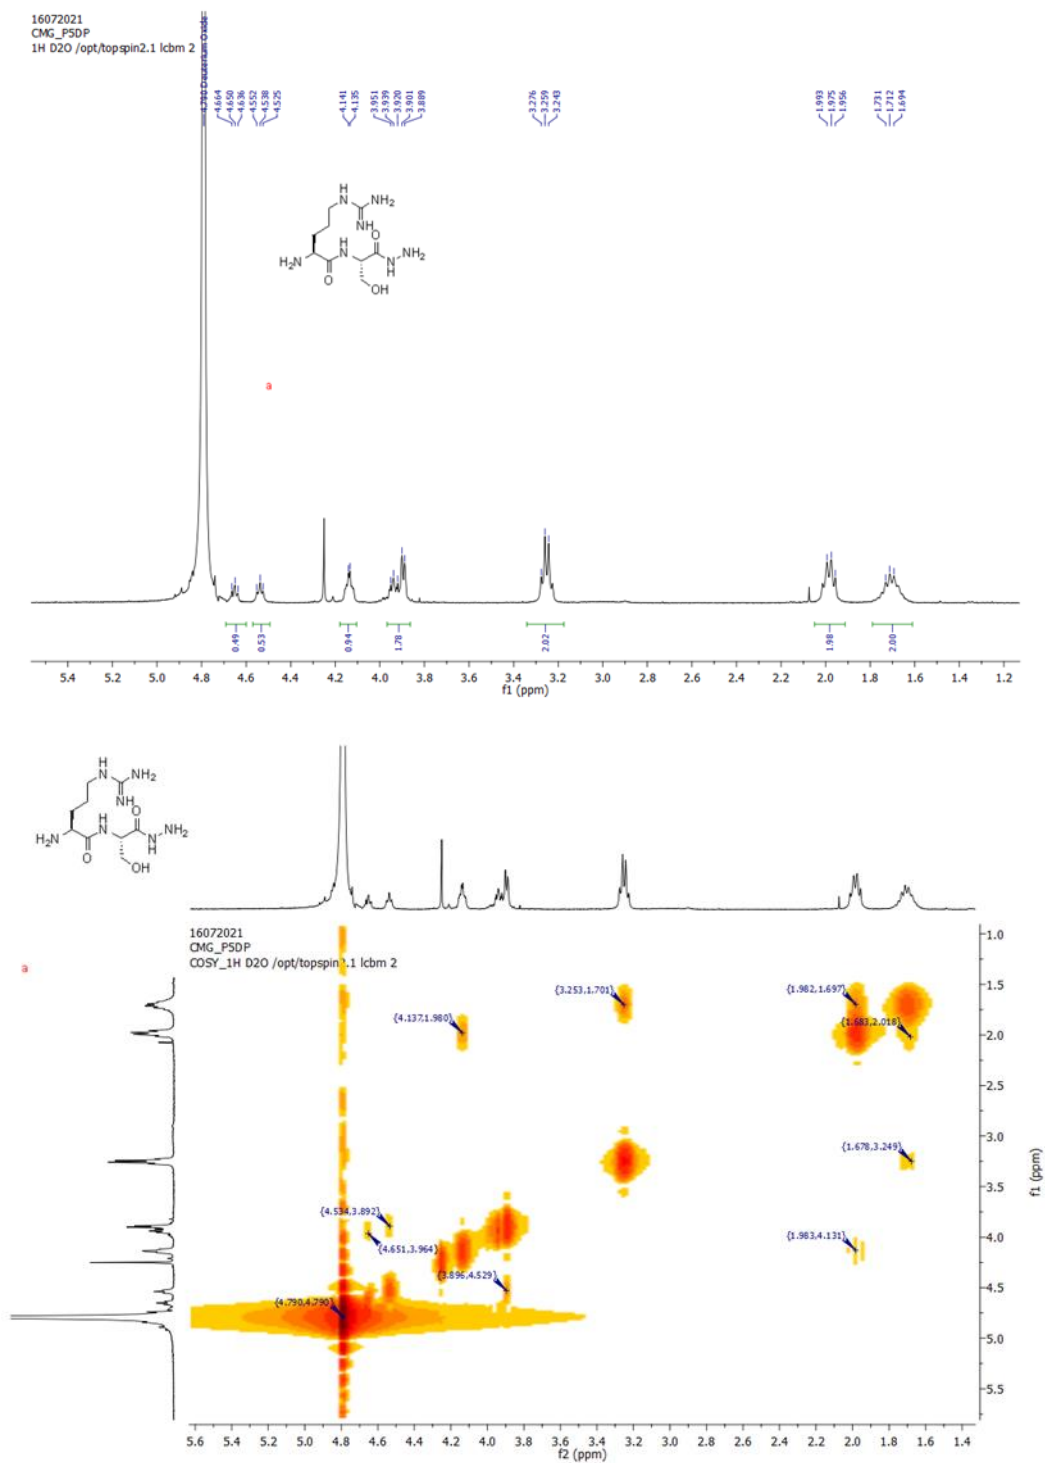

**Figure S21:**  $^1\text{H}$  NMR (top) and COSY NMR (bottom) spectra of ArgSer-Hyd.

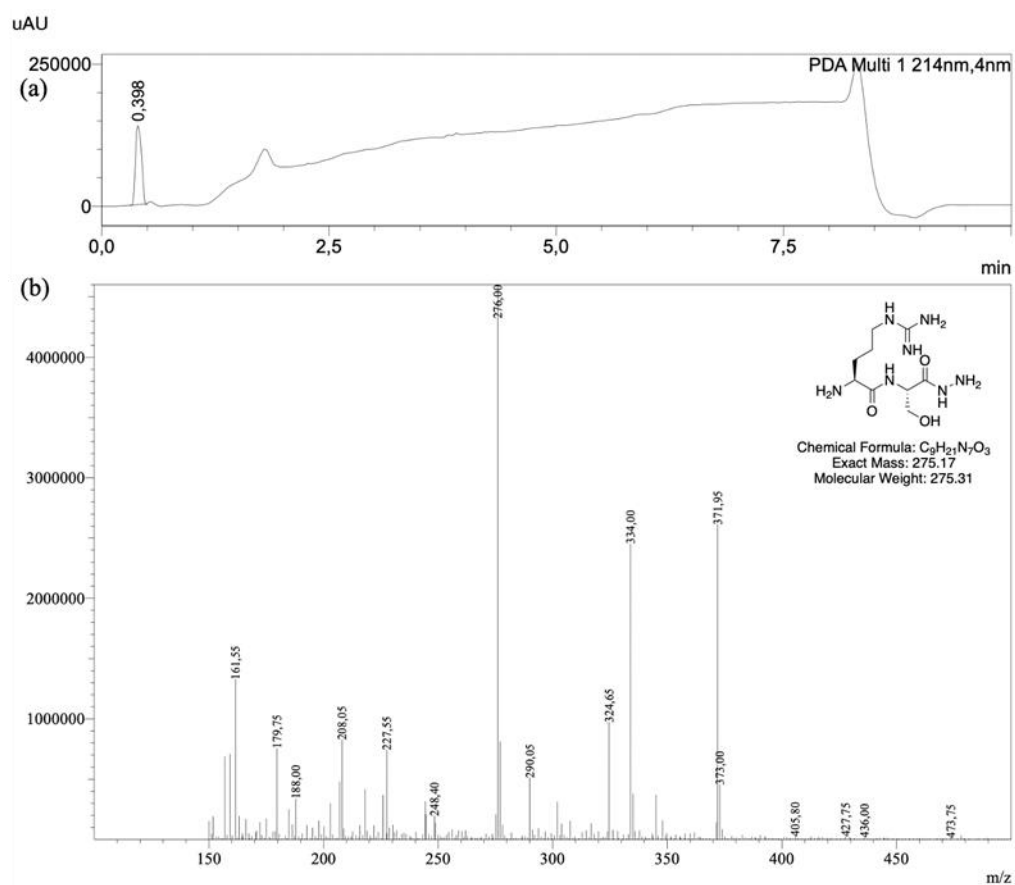

**Figure S22:** HPLC chromatogram (top) and mass spectrometry analysis (bottom) of **ArgSer-Hyd**.



**Arg<sub>2</sub>(Pbf)<sub>2</sub>Ser(<sup>t</sup>Bu)-Hyd:** Isolated by preparative reverse-phase HPLC (linear gradient from 80/20 A/B eluents to 5/95 A/B eluents in 30 min, keeping this composition for 10 more min). <sup>1</sup>H NMR (400 MHz, CD<sub>3</sub>OD) δ 4.24 (t, *J* = 5.5 Hz, 1H), 4.20 (dd, *J* = 8.4, 5.1 Hz, 1H), 3.74 (t, *J* = 6.2 Hz, 1H), 3.37 (ddd, *J* = 15.3, 9.2, 5.6 Hz, 2H), 2.93 (t, *J* = 6.5 Hz, 4H), 2.70 (s, 4H), 2.28 (s, 6H), 2.22 (s, 6H), 1.79 (s, 6H), 1.60 (m, 3H), 1.40 (m, 5H), 1.16 (s, 12H), 0.88 (s, 9H). MS (ESI) *m/z* calculated C<sub>45</sub>H<sub>74</sub>N<sub>11</sub>O<sub>10</sub>S<sub>2</sub> [M+H]<sup>+</sup>: 992.506; observed: 992.40.

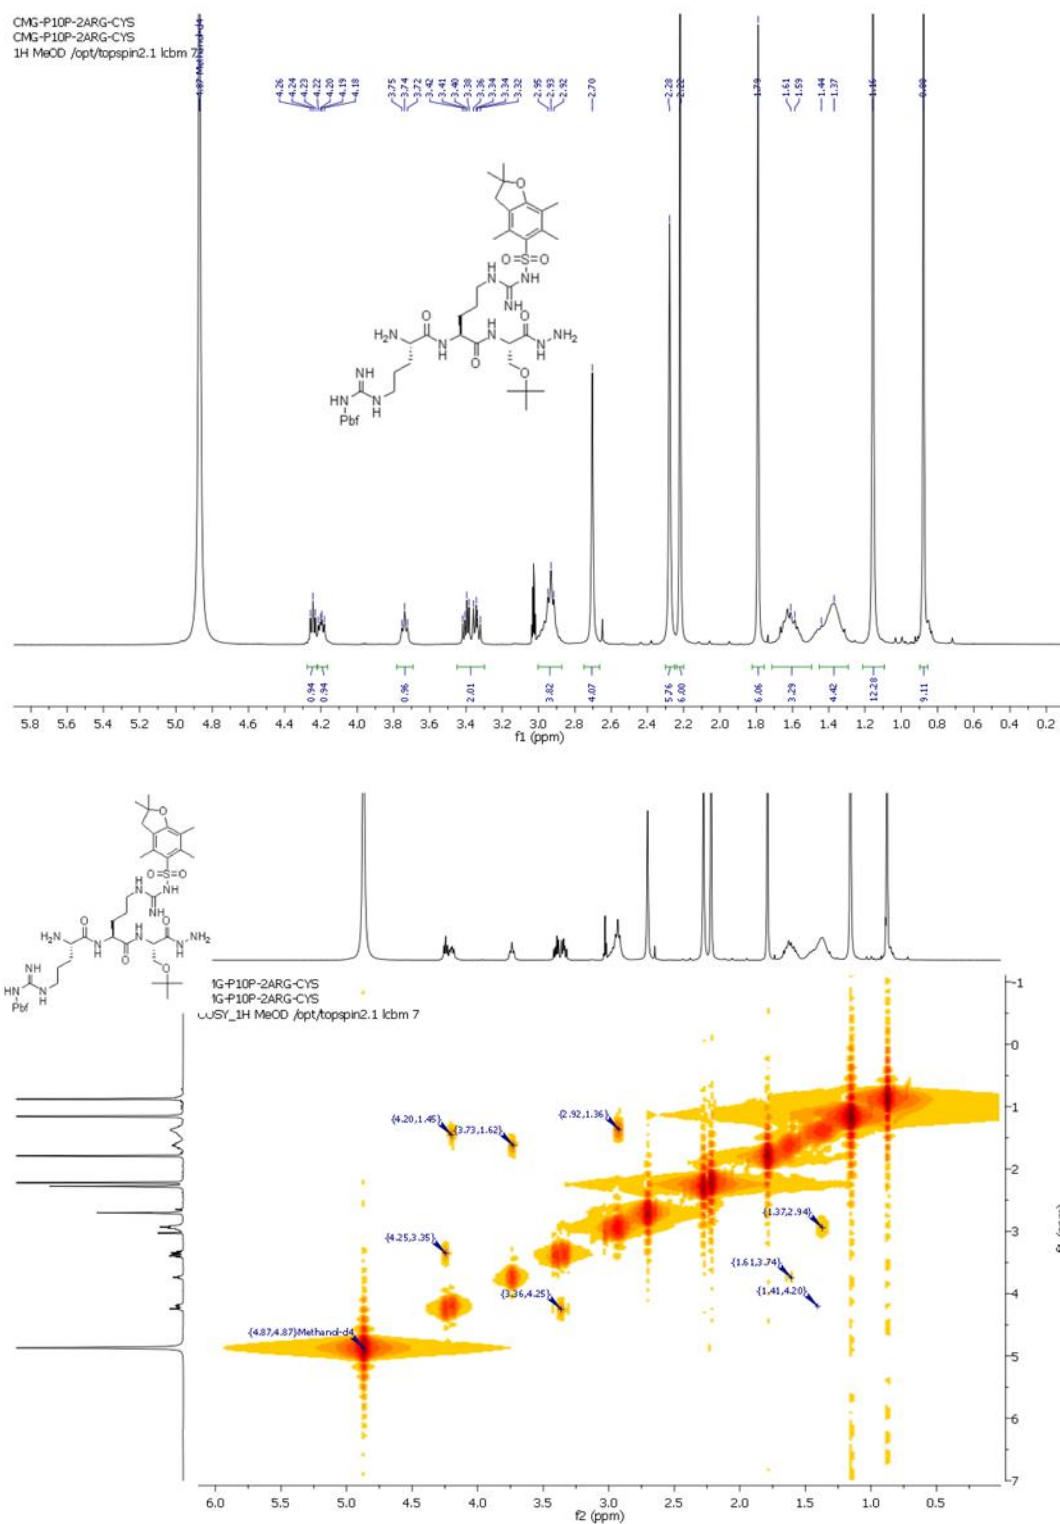

**Figure S23:** <sup>1</sup>H NMR (top) and COSY NMR (bottom) spectra of Arg<sub>2</sub>(Pbf)<sub>2</sub>Ser(<sup>t</sup>Bu)-Hyd.

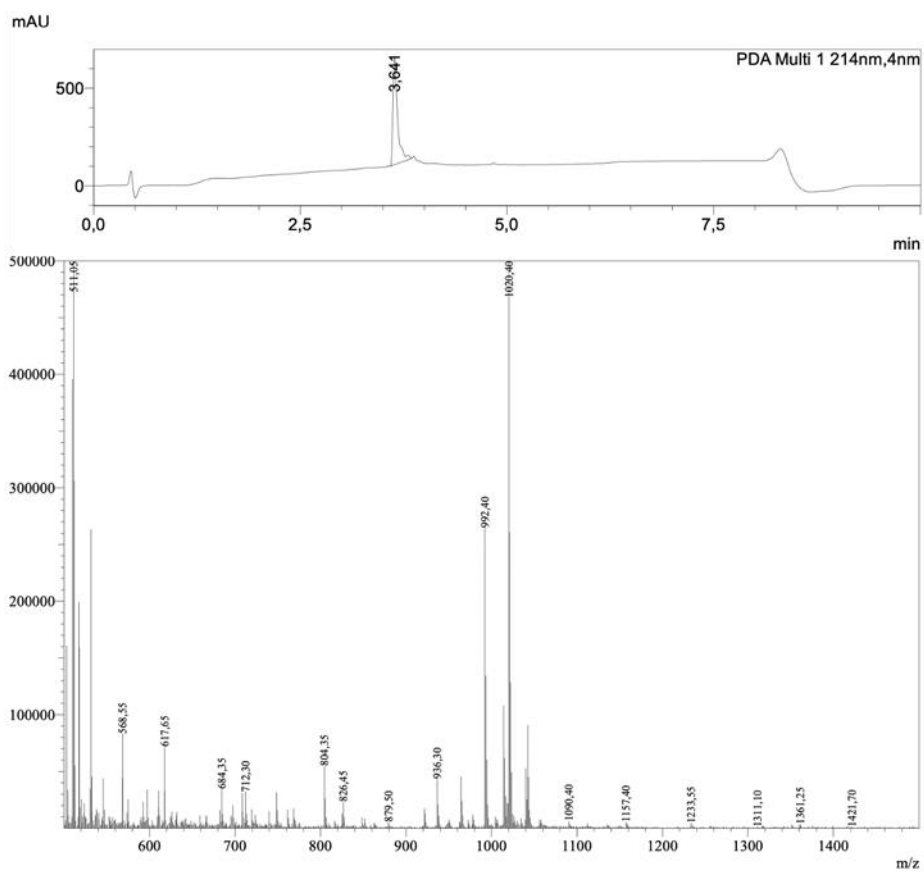

**Figure S24:** HPLC chromatogram (top) and mass spectrometry analysis (bottom) of  $\text{Arg}_2(\text{Pbf})_2\text{Ser}(\text{tBu})\text{-Hyd}$ .

**Arg<sub>2</sub>Ser-Hyd**: <sup>1</sup>H NMR (400 MHz, D<sub>2</sub>O) δ 4.49 (br, 1H), 4.39 (br, 1H), 4.04 (br, 1H), 3.86 (br, 2H), 3.19 (br, 4H), 1.87 (br, 4H), 1.64 (br, 4H). MS (ESI) m/z calculated C<sub>15</sub>H<sub>33</sub>N<sub>11</sub>O<sub>4</sub> [M+H]<sup>+</sup>: 432.278; observed: 432.20.

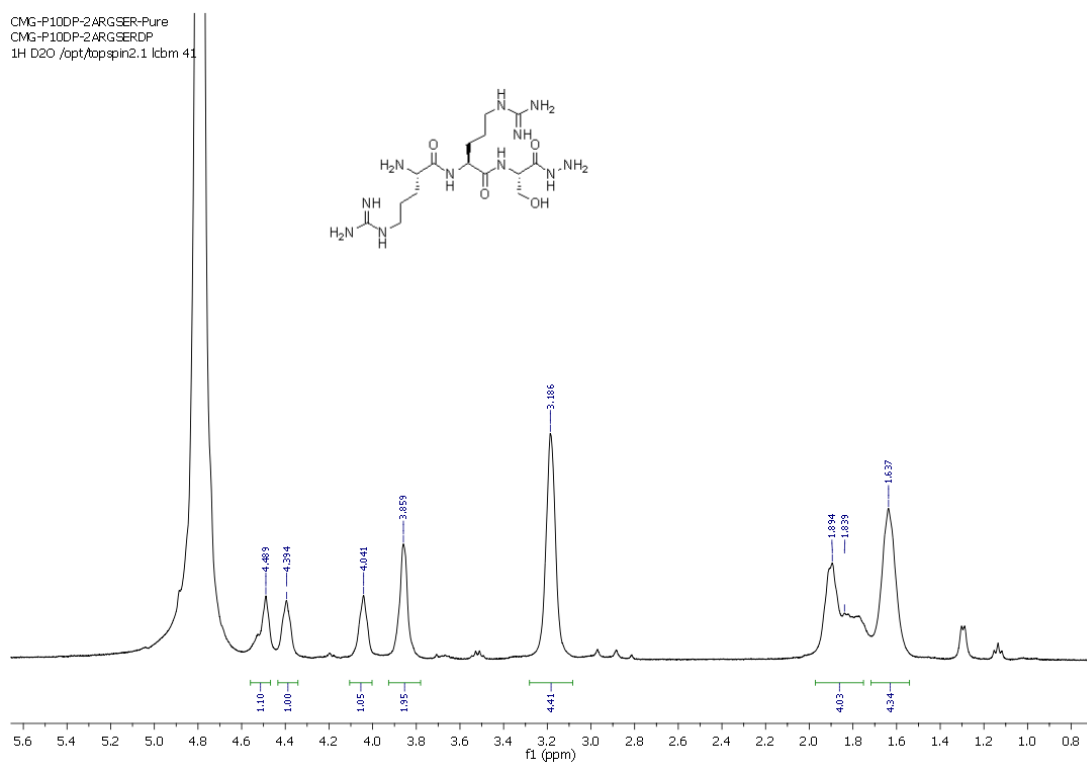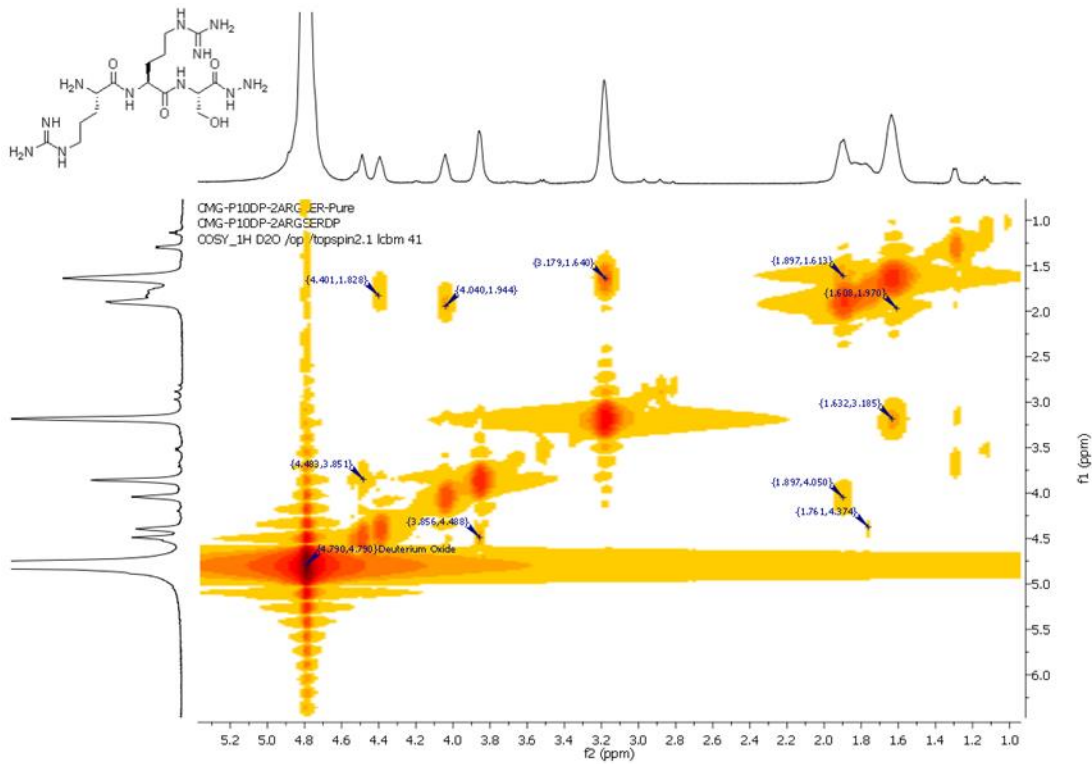

**Figure S25:** <sup>1</sup>H NMR (top) and COSY NMR (bottom) spectra of Arg<sub>2</sub>Ser-Hyd.

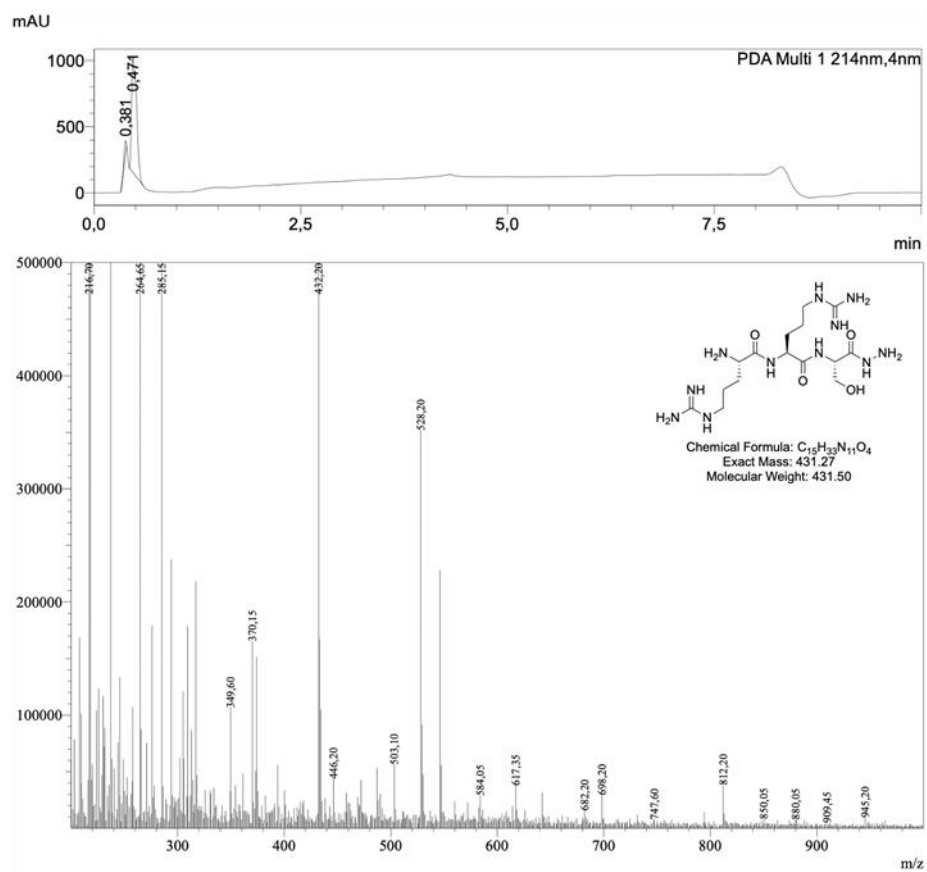

**Figure S26:** HPLC chromatogram (top) and mass spectrometry analysis (bottom) of **Arg<sub>2</sub>Ser-Hyd**.

### 3. Characterization of TPP conjugates and cages

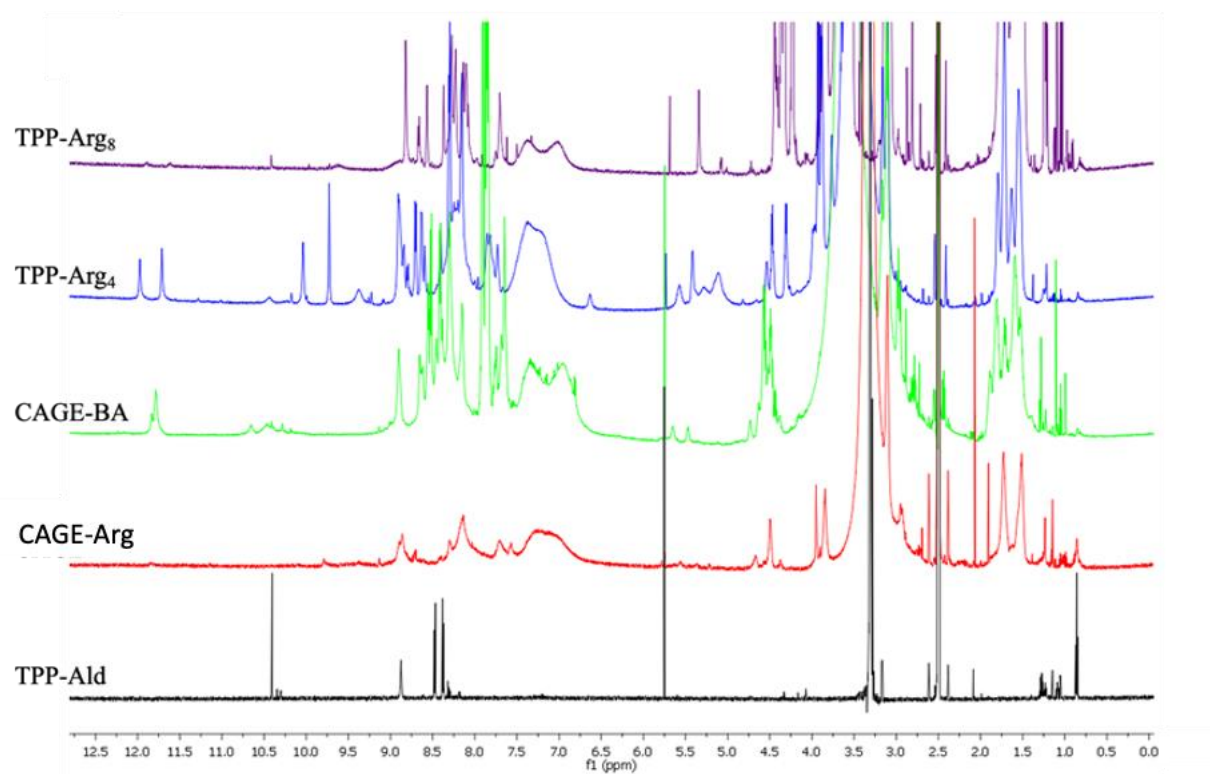

**Figure S27:** Representative <sup>1</sup>H NMR spectra of TPP Conjugates and TPP Cages in DMSO-d<sub>6</sub>.

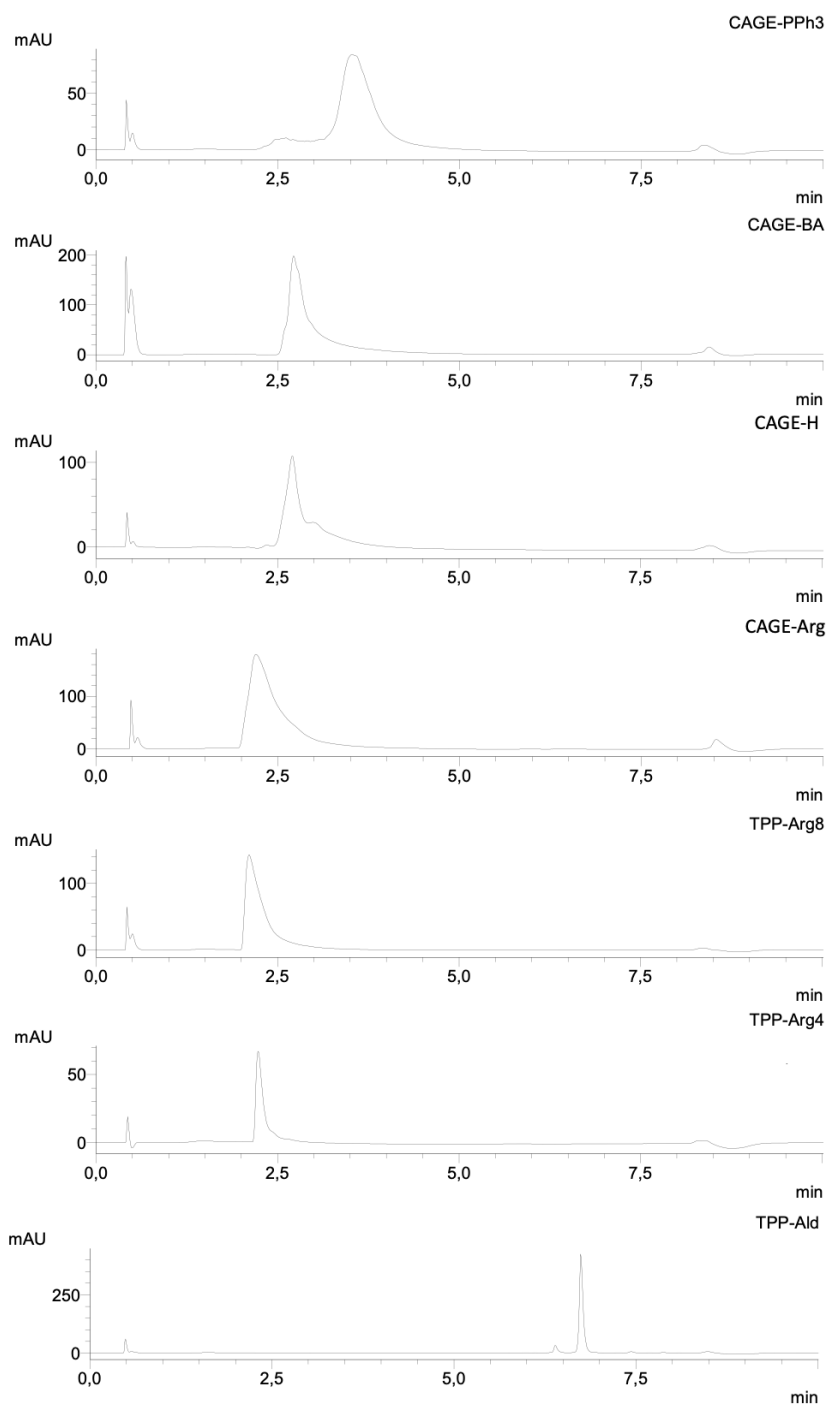

**Figure S28:** Representative HPLC chromatograms of TPP Conjugates and TPP Cages.

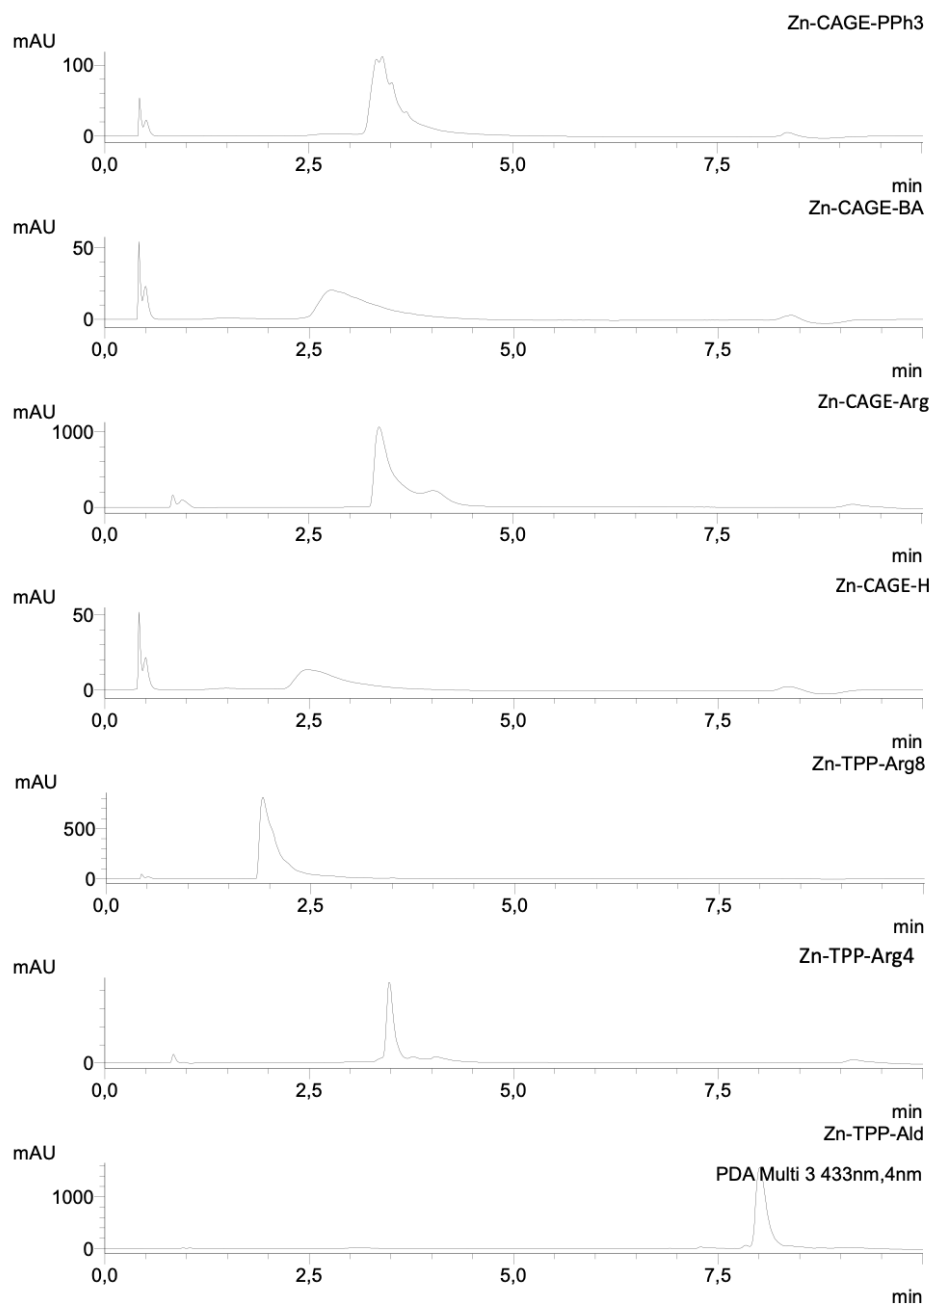

**Figure S29:** Representative HPLC chromatograms of Zn-TPP Conjugates and Zn-TPP Cages.

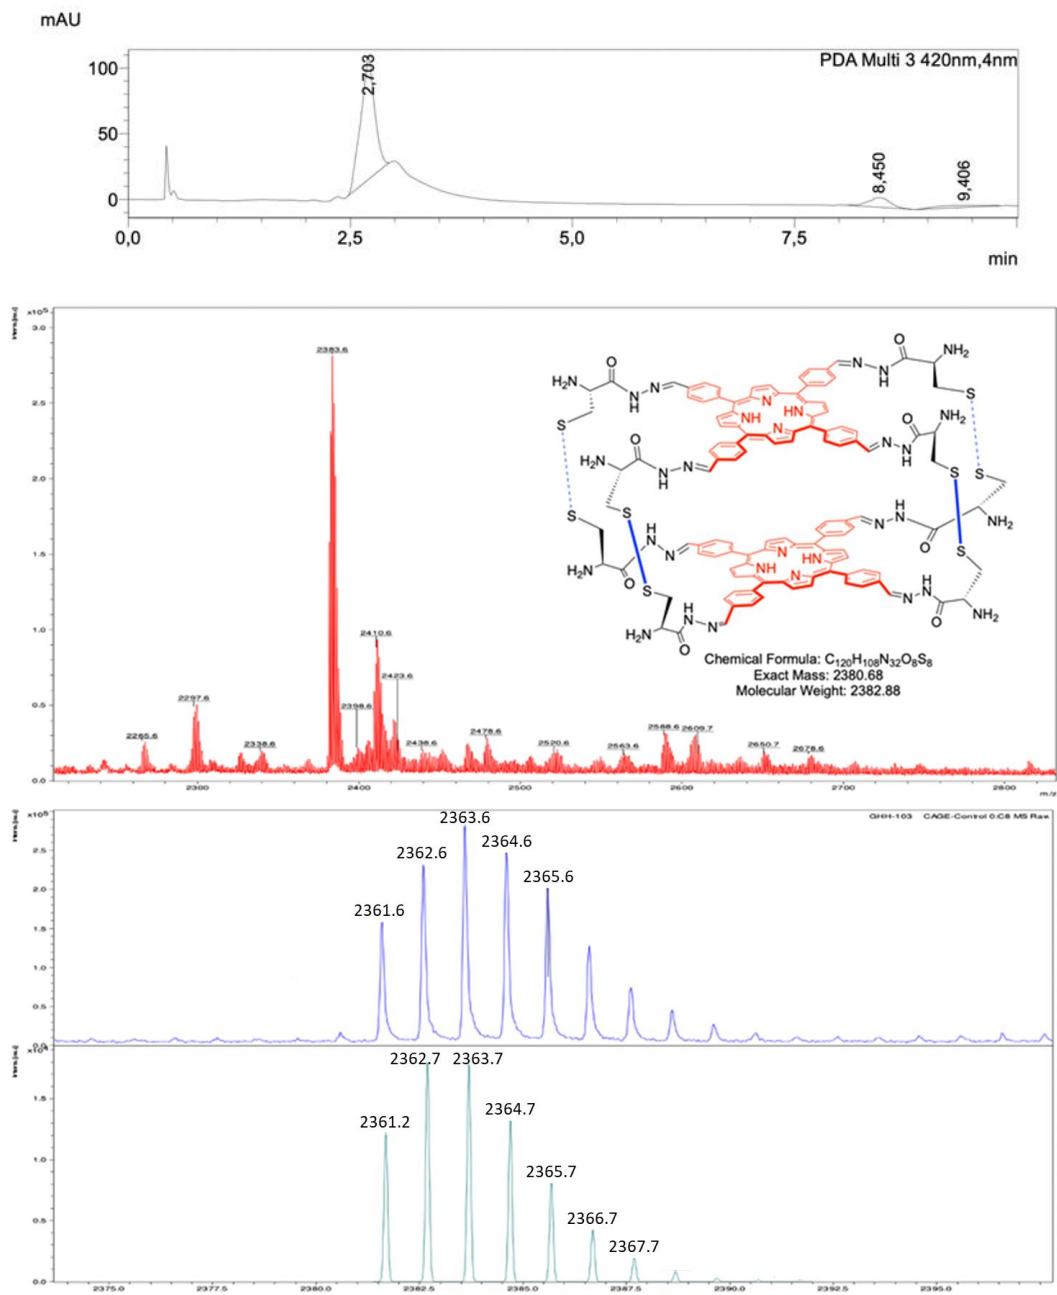

**Figure S30:** HPLC chromatogram (top) and MALDI-TOF mass spectrometry analysis (bottom) of **CAGE-H**.



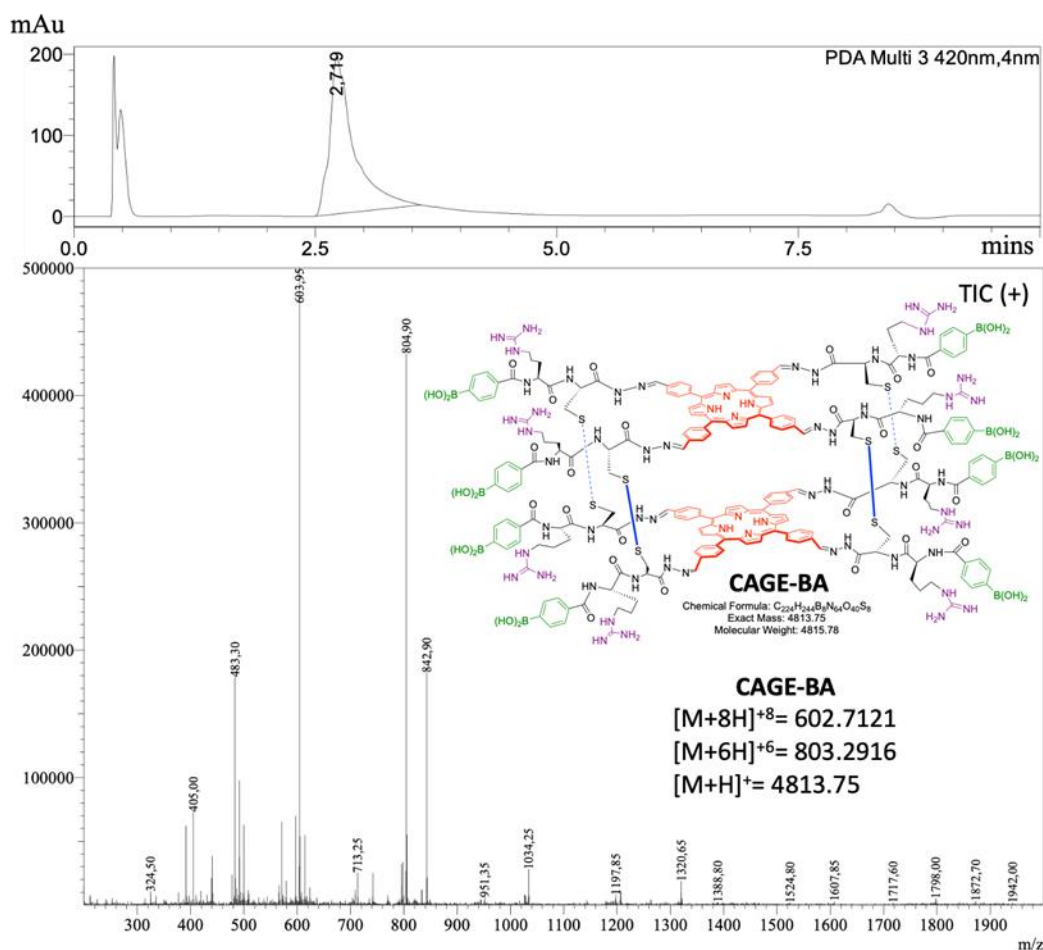

**Figure S31:** HPLC chromatogram (top) and MALDI-TOF mass spectrometry analysis (bottom) of **CAGE-BA**.

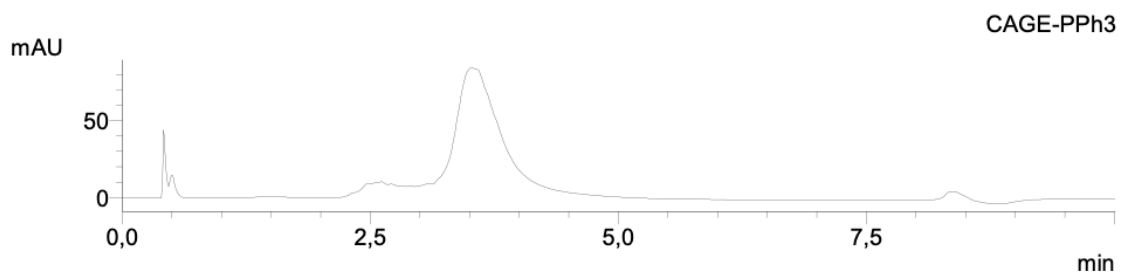

**Figure S32:** HPLC chromatogram of **CAGE-PPh<sub>3</sub>**.

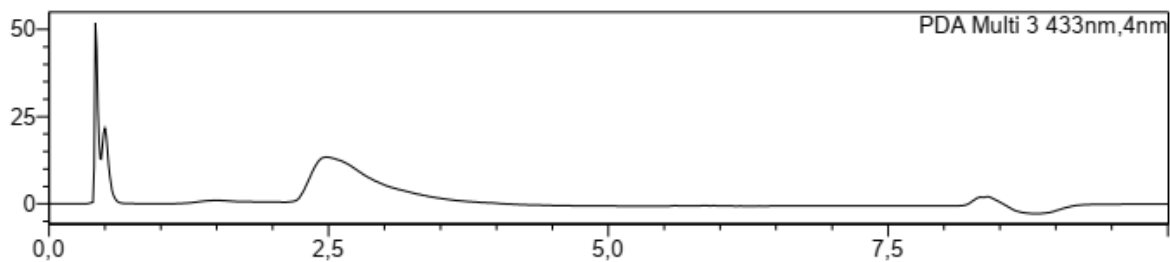

**Figure S33:** HPLC chromatogram of **Zn-CAGE-H**.

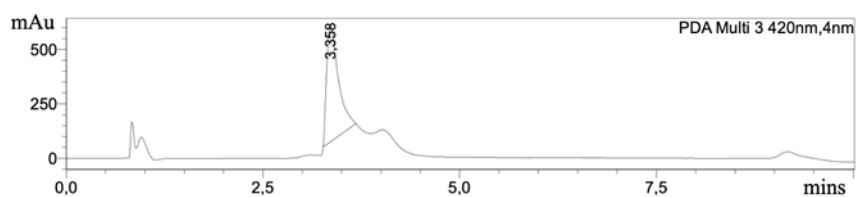

**Figure S34:** HPLC chromatogram analysis of **Zn-CAGE-Arg**.

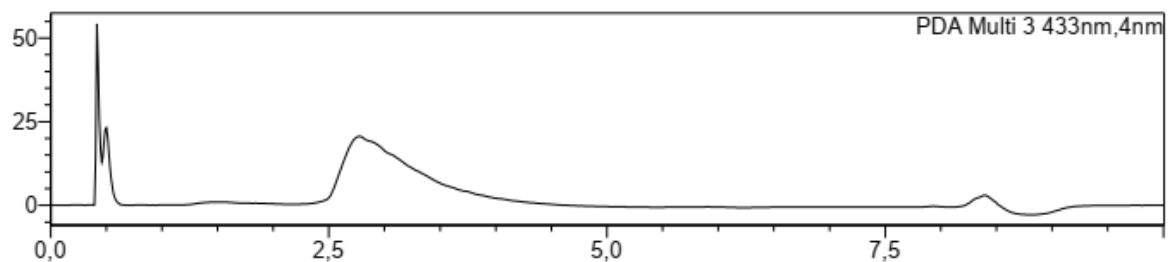

**Figure S35:** HPLC chromatogram of **Zn-CAGE-BA**.

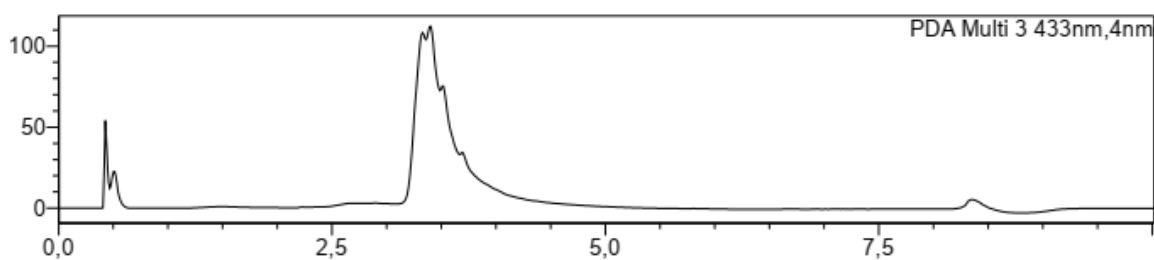

**Figure S36:** HPLC chromatogram of **Zn-CAGE-PPh<sub>3</sub>**.

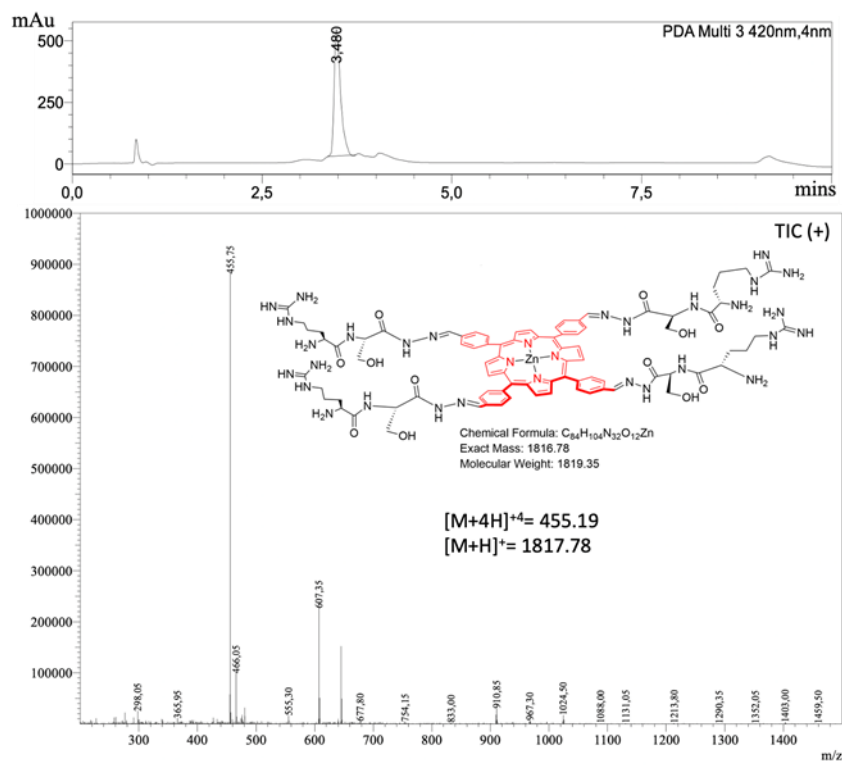

Figure S37: HPLC chromatogram (top) and MALDI-TOF mass spectrometry analysis (bottom) of Zn-TPP-Arg4.

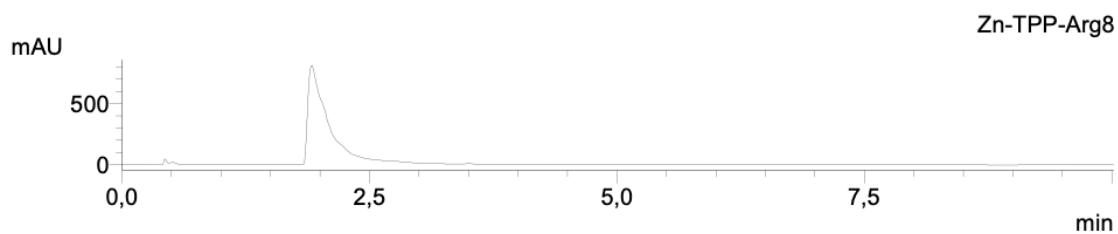

Figure S38: HPLC chromatogram of Zn-TPP-Arg8.

### 3. DOSY NMR

| Entry | Compounds               | $\log(D/m^2s^{-1})$ | $D (m^2s^{-1})$         | $R_{hyd} [\text{Å}]$ | $V_{sph} [\text{Å}^3]$ |
|-------|-------------------------|---------------------|-------------------------|----------------------|------------------------|
| 1.    | TPP-Ald                 | -9.64               | $2.239 \times 10^{-10}$ | 4.9                  | 492.5                  |
| 2.    | CAGE-H                  | -10.23              | $9.484 \times 10^{-11}$ | 11.5                 | 6367.39                |
| 3.    | TPP-Arg <sub>4</sub>    | -10.167             | $6.807 \times 10^{-11}$ | 16.1                 | 17472.1                |
| 4.    | TPP-Arg <sub>8</sub>    | -10.336             | $4.613 \times 10^{-11}$ | 23.7                 | 52279.61               |
| 5.    | Zn-CAGE-H               | -9.82               | $1.513 \times 10^{-10}$ | 7.2                  | 1560.17                |
| 6.    | Zn-TPP-Arg <sub>4</sub> | -9.897              | $1.267 \times 10^{-10}$ | 8.6                  | 2681.57                |
| 7.    | Zn-TPP-Arg <sub>8</sub> | -10.07              | $8.511 \times 10^{-11}$ | 12.8                 | 8766.09                |

**Table S1:** Hydrodynamic radii and spherical volumes calculated using the Stokes-Einstein equation.

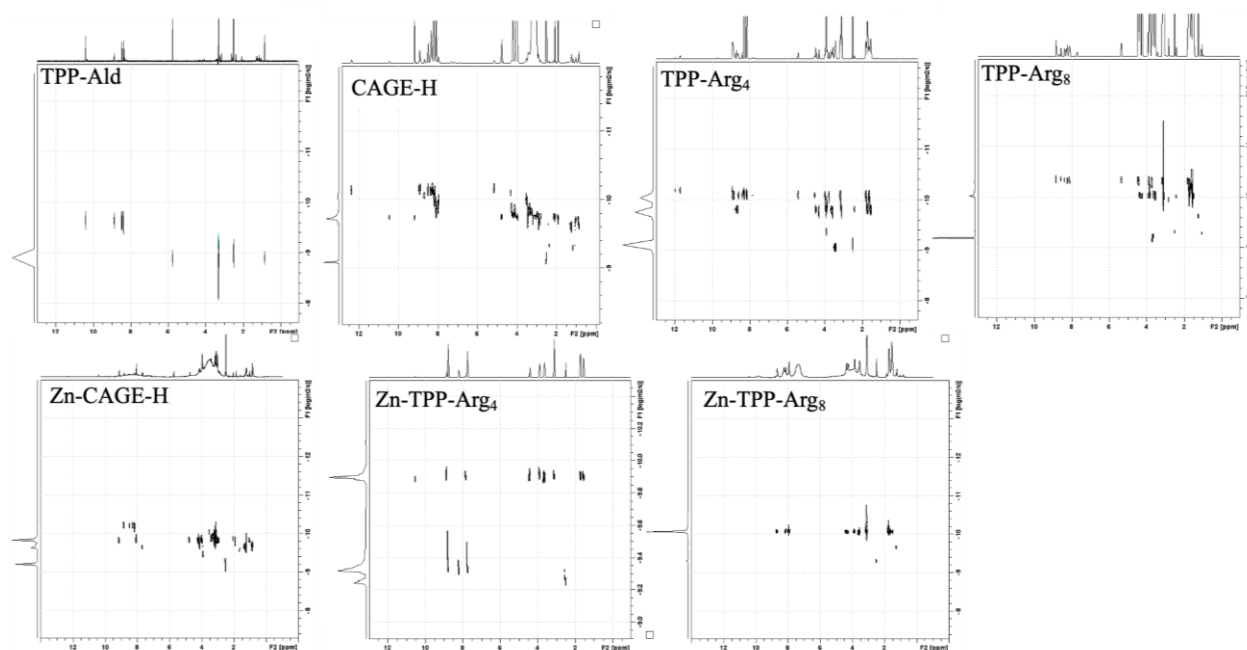

**Figure S39:** DOSY NMR spectra.

#### 4. UV and Fluorescence analyses

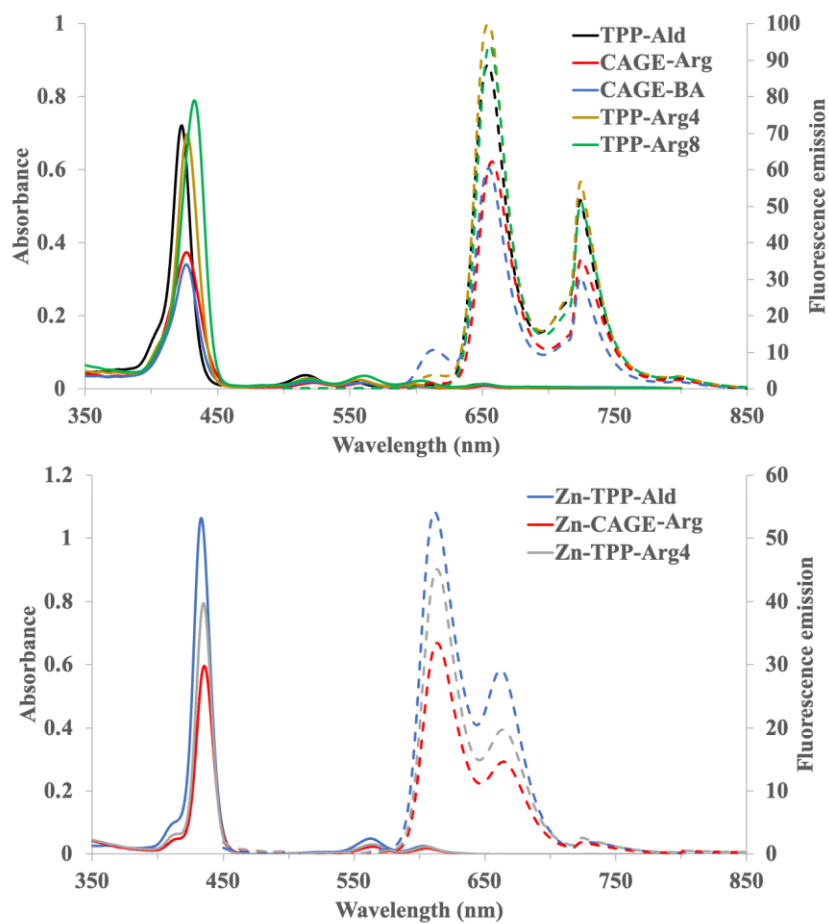

**Figure S40:** UV-Vis absorption (solid lines) and fluorescence (dashed lines) spectra in DMSO of representative free base (M=2H) (top) and metallated (M=Zn) (bottom) porphyrin derivatives .

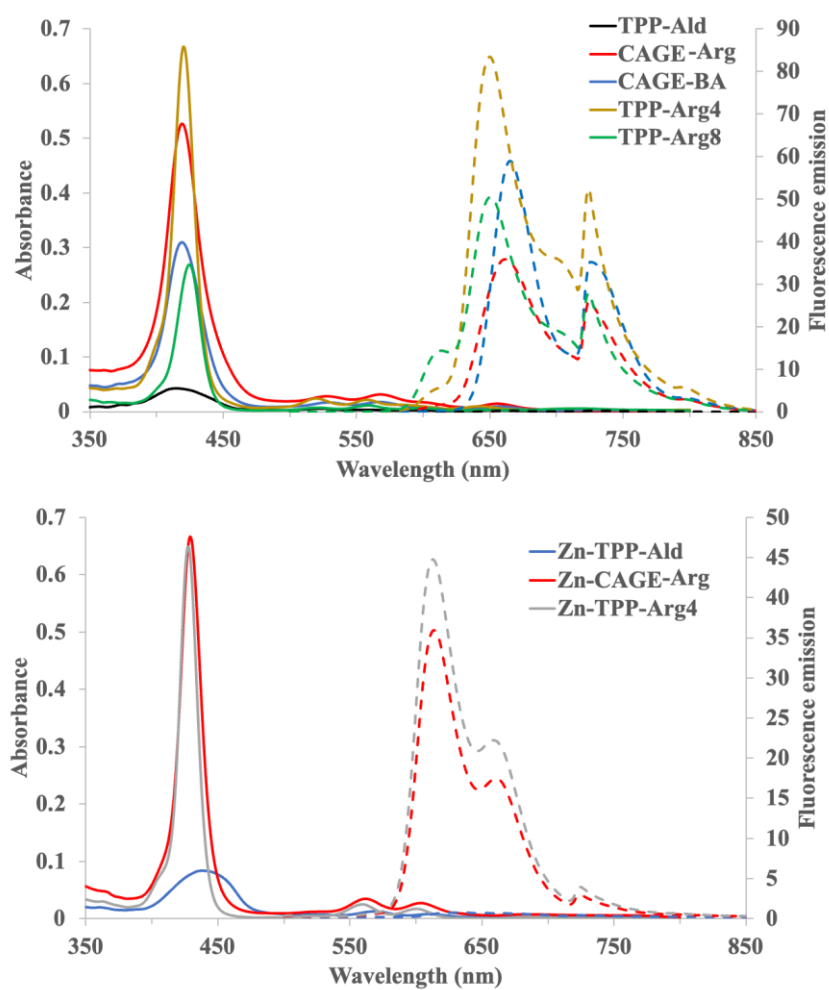

**Figure S41:** UV-Vis absorption (solid lines) and fluorescence (dashed lines) spectra in H<sub>2</sub>O of representative free base (M=2H) (top) and metallated (M=Zn) (bottom) porphyrin derivatives .

## 5. Singlet oxygen generation

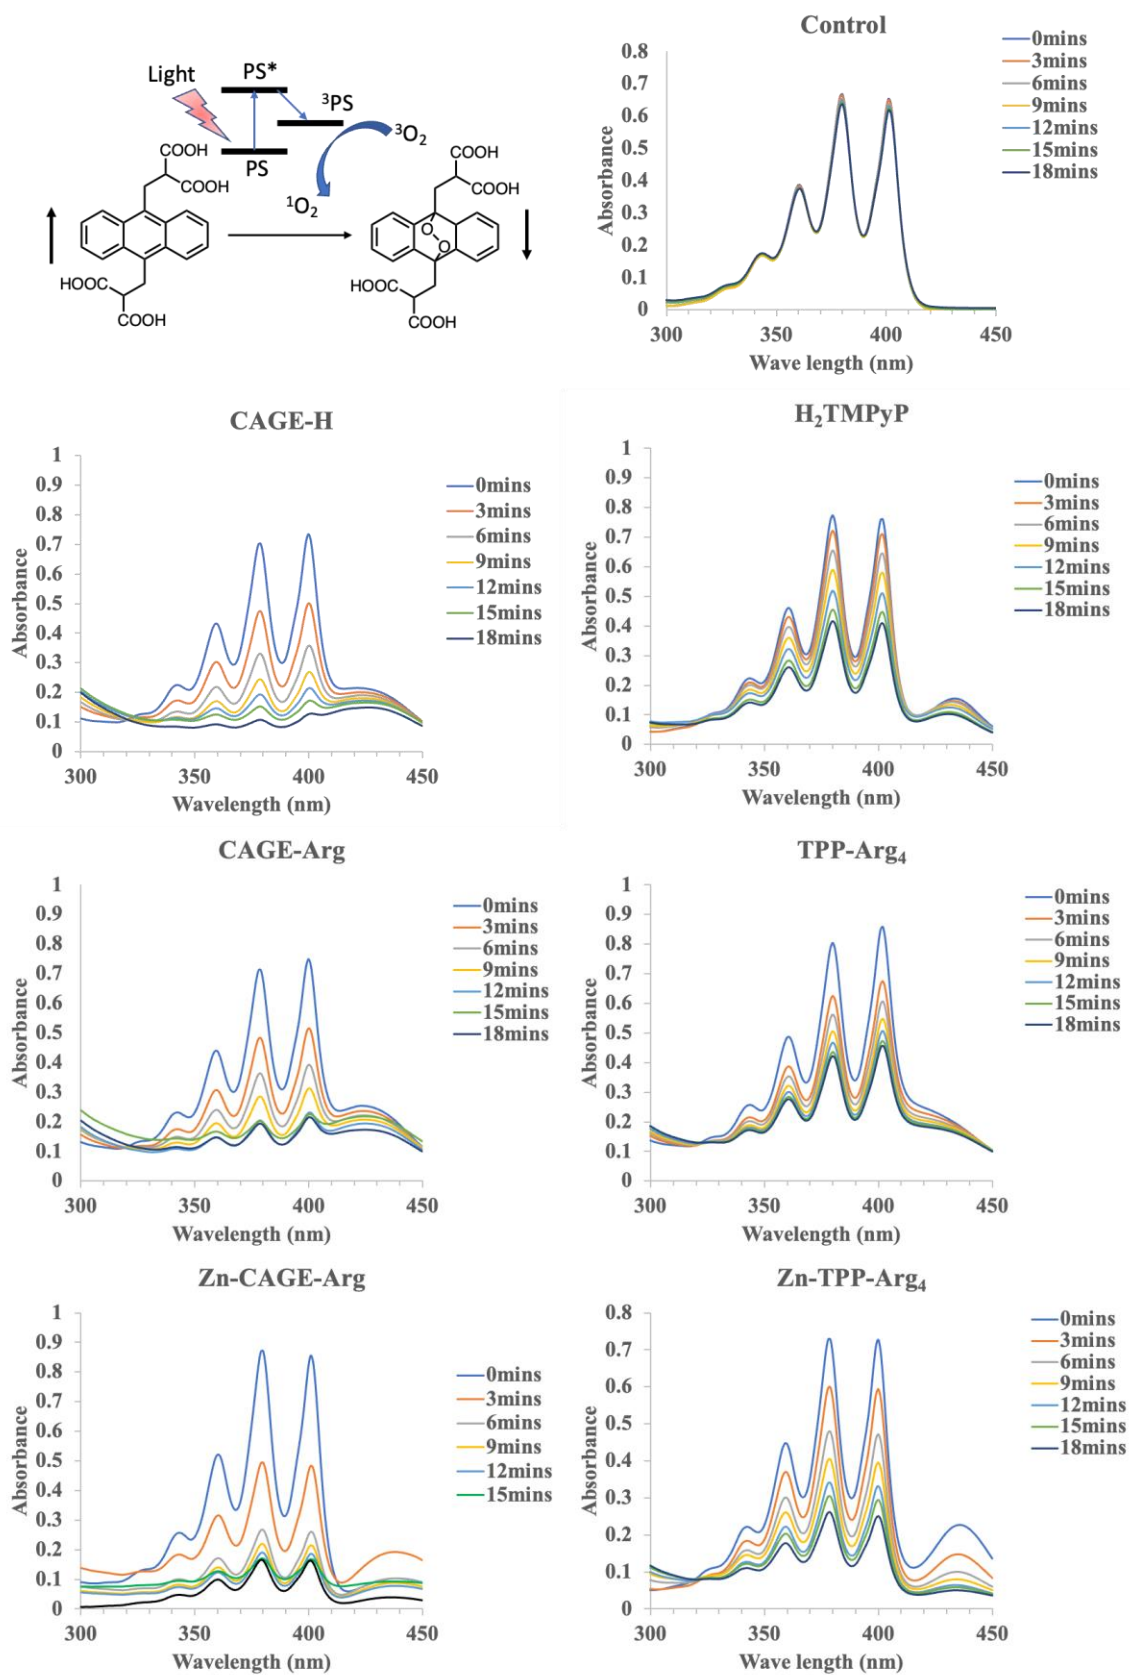

**Figure S42:** Singlet oxygen generation probed by UV absorption spectroscopy using ABDA as a probe at varying light irradiation times (green light,  $\lambda = 525$  nm).

## 6. PDT on cells

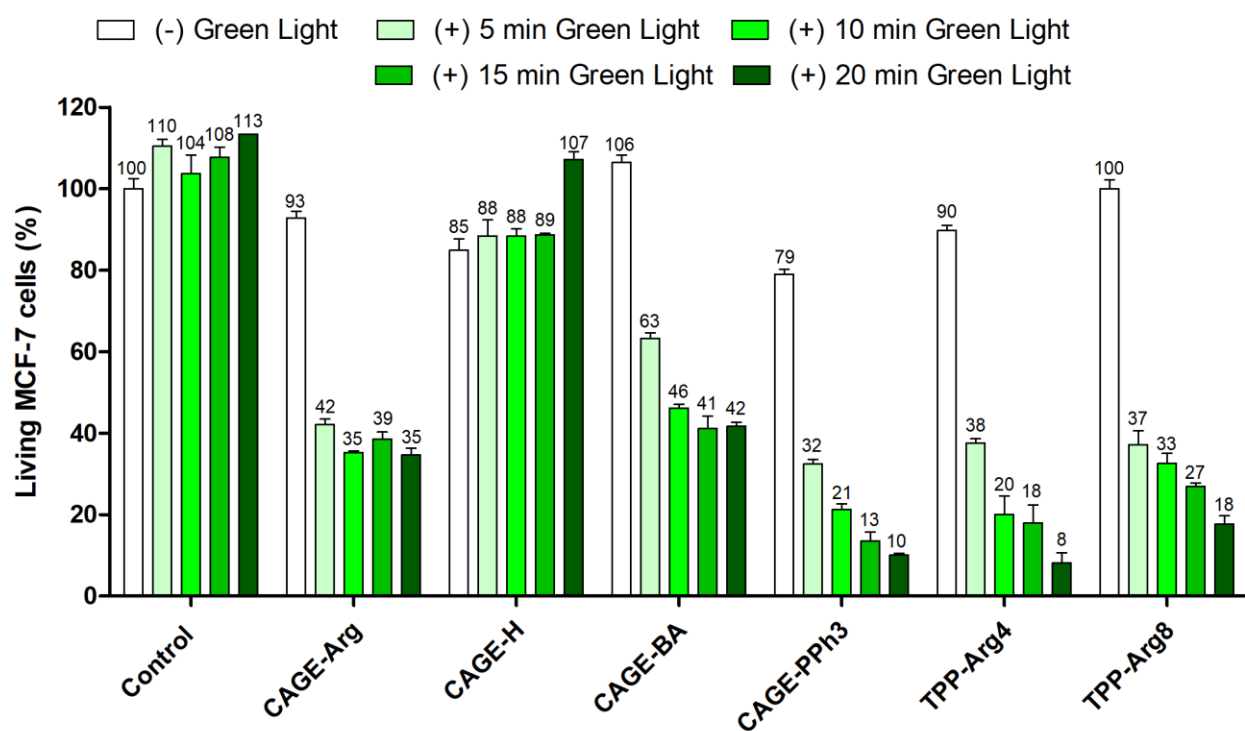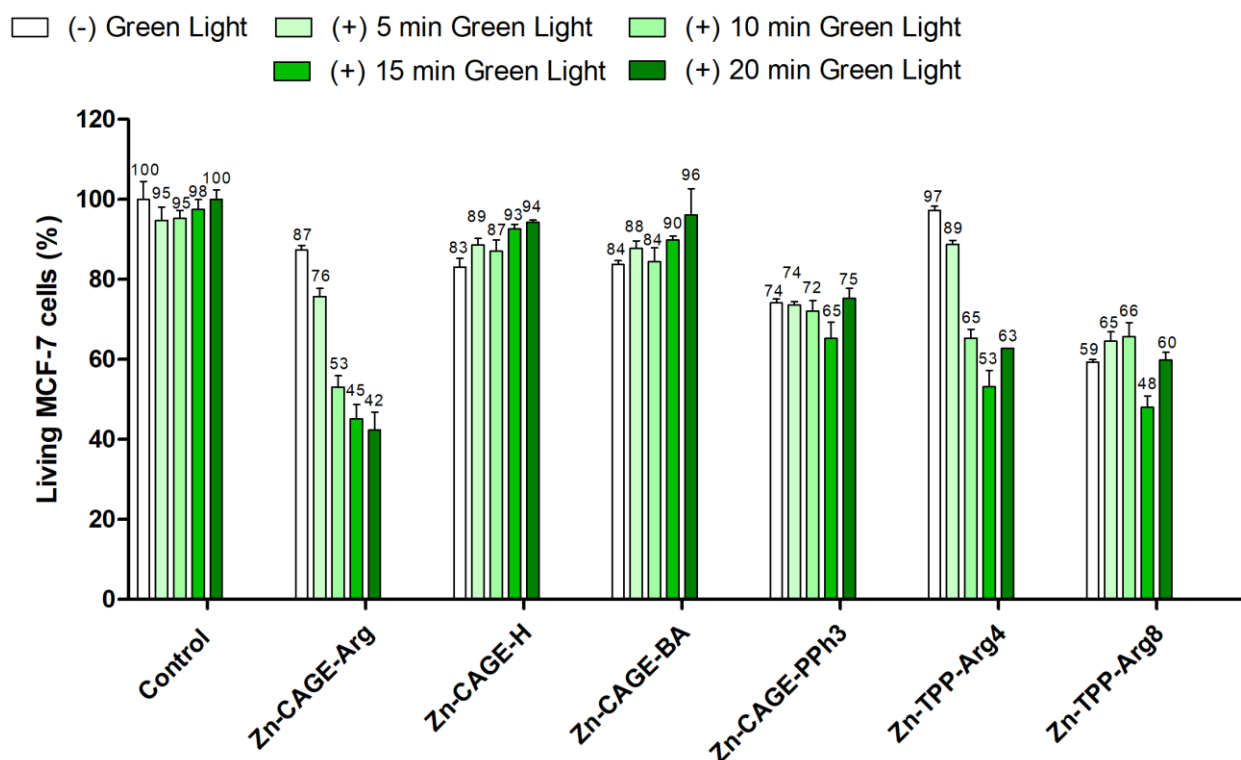

**Figure S43:** PDT study in human breast cancer (MCF-7) cells incubated with 1.31  $\mu\text{M}$  of compounds for 24 h then exposed to green light for different irradiation times. Data are presented as mean  $\pm$  SEM.



## 7. ROS production in cells

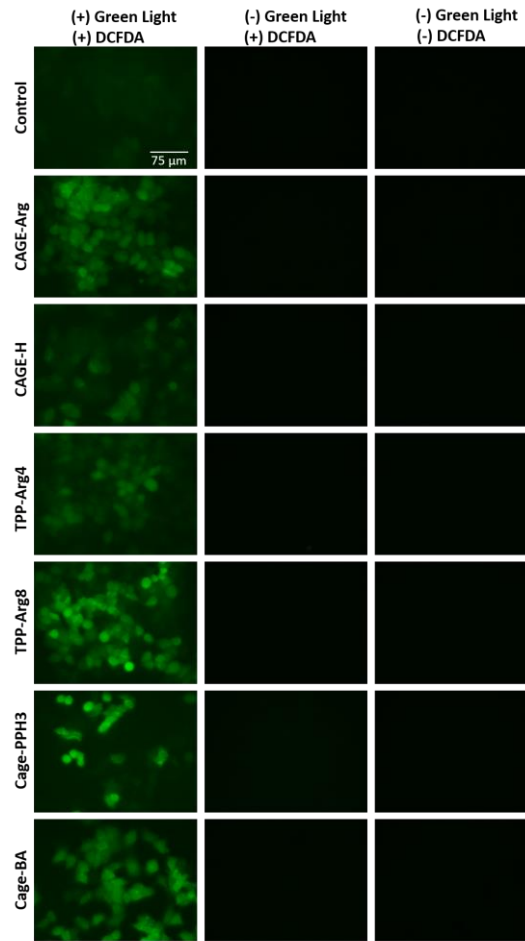

**Figure S44:** Fluorescence microscopy imaging of ROS using DCFDA assay in MCF-7 cells treated (or not) with 1.31  $\mu\text{M}$  of compounds for 24 h, then, exposed (or not) to green light irradiation for 10 min.

## 8. Cellular uptake kinetics

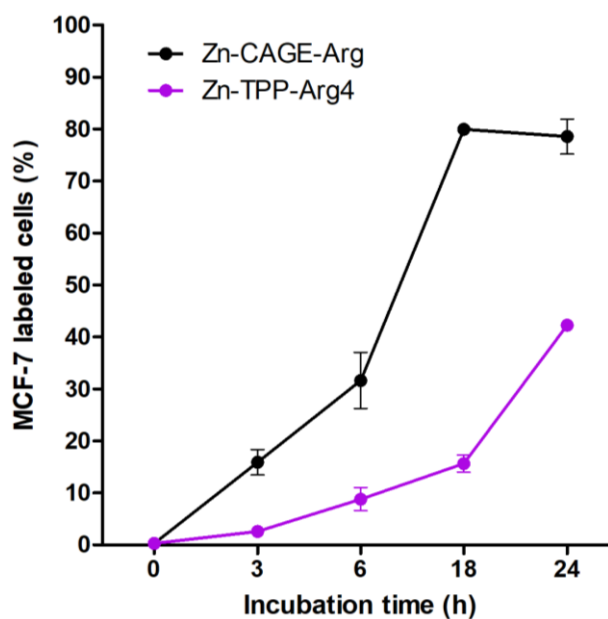

**Figure S45:** Uptake kinetics study of compounds incubated with human breast cancer (MCF-7) cells at 1.31  $\mu\text{M}$  concentration for different time intervals. Data are presented as mean  $\pm$  SEM.
